# Supplementary material
Source: PubMed Central journal article supplement (PMC10580156)
Supplement: jamaneurol-e233618-s002.pdf [file jamaneurol-e233618-s002.pdf]

\*First name, last name, and suffix (if applicable) are required and will appear in PubMed.

| <b>*Group Name(s): Dominantly Inherited Alzheimer Network and the Alzheimer's Disease Neuroimaging Initiative</b> |                   |                              |                         |                                                         |                                                 |                                                                                                                                                                                                                    |                                                                                                   |
|-------------------------------------------------------------------------------------------------------------------|-------------------|------------------------------|-------------------------|---------------------------------------------------------|-------------------------------------------------|--------------------------------------------------------------------------------------------------------------------------------------------------------------------------------------------------------------------|---------------------------------------------------------------------------------------------------|
| <b>*First Name and Middle Initial(s)</b>                                                                          | <b>*Last Name</b> | <b>*Suffix (eg, Jr, III)</b> | <b>Academic Degrees</b> | <b>Institution</b>                                      | <b>Location (city, state/province, country)</b> | <b>Role or Contribution, eg, chair, principal investigator</b>                                                                                                                                                     | <b>Group (if more than 1 Group listed in the byline) and/or Subgroup (eg, Steering Committee)</b> |
| Michael W.                                                                                                        | Weiner            |                              | MD                      | University of California, San Francisco                 | San Francisco, California, USA                  | Principal Investigator, Executive Committee, Administrative Core - Northern California Institute for Research & Education (NCIRE / The Veterans Health Research Institute), Initial Concept Planning & Development | ADNI                                                                                              |
| Paul                                                                                                              | Aisen             |                              | MD                      | University of Southern California                       | Los Angeles, California, USA                    | ATRI PI and Director of Coordinating Center Clinical Core, Executive Committee, Clinical Core Leaders and Key Personnel                                                                                            | ADNI                                                                                              |
| Ronald                                                                                                            | Petersen          |                              | MD, PhD                 | Mayo Clinic, Rochester                                  | Rochester, Minnesota, USA                       | ATRI PI and Director of Coordinating Center Clinical Core, Co PI of Clinical Core, Executive Committee, Clinical Core Leaders and Key Personnel, Investigator                                                      | ADNI                                                                                              |
| Clifford R.                                                                                                       | Jack              | Jr.                          | MD                      | Mayo Clinic, Rochester                                  | Rochester, Minnesota, USA                       | Executive Committee, MRI Core Leaders and Key Personnel                                                                                                                                                            | ADNI                                                                                              |
| William                                                                                                           | Jagust            |                              | MD                      | University of California, Berkeley                      | Berkeley, CA, USA                               | Executive Committee, PET Core Leaders and Key Personnel                                                                                                                                                            | ADNI                                                                                              |
| John Q.                                                                                                           | Trojanowki        |                              | MD, PhD                 | Perelman School of Medicine, University of Pennsylvania | Philadelphia, Pennsylvania, USA                 | Executive Committee, Biomarkers Core Leaders and Key Personnel                                                                                                                                                     | ADNI                                                                                              |
| Arthur W.                                                                                                         | Toga              |                              | PhD                     | University of Southern California                       | Los Angeles, California, USA                    | Executive Committee, Informatics Core Leaders and Key Personnel                                                                                                                                                    | ADNI                                                                                              |

## Supplemental Online Content: Nonauthor Collaborators

\*First name, last name, and suffix (if applicable) are required and will appear in PubMed.

| *First Name and Middle Initial(s) | *Last Name   | *Suffix (eg, Jr, III) | Academic Degrees | Institution                                             | Location (city, state/province, country) | Role or Contribution, eg, chair, principal investigator                                                 | Group (if more than 1 Group listed in the byline) and/or Subgroup (eg, Steering Committee) |
|-----------------------------------|--------------|-----------------------|------------------|---------------------------------------------------------|------------------------------------------|---------------------------------------------------------------------------------------------------------|--------------------------------------------------------------------------------------------|
| Laurel                            | Beckett      |                       | PhD              | University of California, Davis                         | Davis, California, USA                   | Executive Committee, Biostatistics Core Leader and Key Personnel                                        | ADNI                                                                                       |
| Robert C.                         | Green        |                       | MD, MPH          | Brigham and Women's Hospital/Harvard Medical School     | Boston, Massachusetts, USA               | Executive Committee, Data and Publications Committee                                                    | ADNI                                                                                       |
| Andrew J.                         | Saykin       |                       | PsyD             | Indiana University School of Medicine                   | Indianapolis, Indiana, USA               | Executive Committee, Genetics Core Leaders and Key Personnel                                            | ADNI                                                                                       |
| John C.                           | Morris       |                       | MD               | Washington University St. Louis                         | St. Louis, Missouri, USA                 | Executive Committee, Neuropathology Core Leaders and Key Personnel, Investigator                        | ADNI                                                                                       |
| Richard J.                        | Perrin       |                       | MD, PhD          | Washington University St. Louis                         | St. Louis, Missouri, USA                 | Executive Committee, ADNI External Advisory Board (ESAB), Neuropathology Core Leaders and Key Personnel | ADNI                                                                                       |
| Leslie M.                         | Shaw         |                       | PhD              | Perelman School of Medicine, University of Pennsylvania | Philadelphia, Pennsylvania, USA          | Executive Committee, Biomarkers Core Leaders and Key Personnel                                          | ADNI                                                                                       |
| Zaven                             | Khachaturian |                       | PhD              | Prevent Alzheimer's Disease 2020 (Chair)                |                                          | ADNI External Advisory Board (ESAB), Initial Concept Planning & Development                             | ADNI                                                                                       |
| Maria                             | Carrillo     |                       | PhD              | Alzheimer's Association                                 | Chicago, Illinois, USA                   | ADNI External Advisory Board (ESAB)                                                                     | ADNI                                                                                       |
| William                           | Potter       |                       | MD               | National Institute of Mental Health                     | Rockville, Maryland, USA                 | ADNI External Advisory Board (ESAB)                                                                     | ADNI                                                                                       |
| Lisa                              | Barnes       |                       | PhD              | Rush University                                         | Chicago, Illinois, USA                   | ADNI External Advisory Board (ESAB)                                                                     | ADNI                                                                                       |
| Marie                             | Bernard      |                       | MD               | NIA                                                     | Bethesda, Maryland, USA                  | ADNI External Advisory Board (ESAB)                                                                     | ADNI                                                                                       |
| Hector                            | González     |                       |                  | University of California, San Diego                     | San Diego, California, USA               | ADNI External Advisory Board (ESAB)                                                                     | ADNI                                                                                       |

Supplemental Online Content: Nonauthor Collaborators

\*First name, last name, and suffix (if applicable) are required and will appear in PubMed.

| *First Name and Middle Initial(s) | *Last Name | *Suffix (eg, Jr, III) | Academic Degrees | Institution                                    | Location (city, state/province, country) | Role or Contribution, eg, chair, principal investigator                                                                       | Group (if more than 1 Group listed in the byline) and/or Subgroup (eg, Steering Committee) |
|-----------------------------------|------------|-----------------------|------------------|------------------------------------------------|------------------------------------------|-------------------------------------------------------------------------------------------------------------------------------|--------------------------------------------------------------------------------------------|
| Carole                            | Ho         |                       |                  | Denali Therapeutics                            | South San Francisco, California, USA     | ADNI External Advisory Board (ESAB)                                                                                           | ADNI                                                                                       |
| John K.                           | Hsiao      |                       | MD               | NIH                                            | Bethesda, Maryland, USA                  | ADNI External Advisory Board (ESAB), NIA                                                                                      | ADNI                                                                                       |
| Jonathan                          | Jackson    |                       | PhD              | Massachusetts General Hospital                 | Boston, Massachusetts, USA               | ADNI External Advisory Board (ESAB)                                                                                           | ADNI                                                                                       |
| Eliezer                           | Masliah    |                       | MD               | NIA                                            | Bethesda, Maryland, USA                  | ADNI External Advisory Board (ESAB)                                                                                           | ADNI                                                                                       |
| Donna                             | Masterman  |                       | MD               | Biogen                                         | Cambridge, Massachusetts, USA            | ADNI External Advisory Board (ESAB)                                                                                           | ADNI                                                                                       |
| Ozioma                            | Okonkwo    |                       | PhD              | University of Wisconsin, Madison               | Madison, Wisconsin, USA                  | ADNI External Advisory Board (ESAB)                                                                                           | ADNI                                                                                       |
| Laurie                            | Ryan       |                       | PhD              | NIA                                            | Bethesda, Maryland, USA                  | ADNI External Advisory Board (ESAB)                                                                                           | ADNI                                                                                       |
| Nina                              | Silverberg |                       | PhD              | NIA                                            | Bethesda, Maryland, USA                  | ADNI External Advisory Board (ESAB)                                                                                           | ADNI                                                                                       |
| Adam                              | Fleisher   |                       | MD               | Eli Lilly (Chair)                              | Indianapolis, Indiana, USA               | ADNI 3 Private PartnerScientific Board (PPSB)                                                                                 | ADNI                                                                                       |
| Diana Truran                      | Sacrey     |                       |                  | NCIRE / The Veterans Health Research Institute | San Francisco, California, USA           | Administrative Core - Northern California Institute for Research & Education (NCIRE / The Veterans Health Research Institute) | ADNI                                                                                       |
| Juliet                            | Fockler    |                       |                  | University of California, San Francisco        | San Francisco, California, USA           | Administrative Core - Northern California Institute for Research & Education (NCIRE / The Veterans Health Research Institute) | ADNI                                                                                       |

## Supplemental Online Content: Nonauthor Collaborators

\*First name, last name, and suffix (if applicable) are required and will appear in PubMed.

| *First Name and Middle Initial(s) | *Last Name | *Suffix (eg, Jr, III) | Academic Degrees | Institution                                    | Location (city, state/province, country) | Role or Contribution, eg, chair, principal investigator                                                                                                             | Group (if more than 1 Group listed in the byline) and/or Subgroup (eg, Steering Committee) |
|-----------------------------------|------------|-----------------------|------------------|------------------------------------------------|------------------------------------------|---------------------------------------------------------------------------------------------------------------------------------------------------------------------|--------------------------------------------------------------------------------------------|
| Cat                               | Conti      |                       | BA               | NCIRE / The Veterans Health Research Institute | San Francisco, California, USA           | Administrative Core - Northern California Institute for Research & Education (NCIRE / The Veterans Health Research Institute), Resource Allocation Review Committee | ADNI                                                                                       |
| Dallas                            | Veitch     |                       | PhD              | NCIRE / The Veterans Health Research Institute | San Francisco, California, USA           | Administrative Core - Northern California Institute for Research & Education (NCIRE / The Veterans Health Research Institute)                                       | ADNI                                                                                       |
| John                              | Neuhaus    |                       | PhD              | University of California, San Francisco        | San Francisco, California, USA           | Administrative Core - Northern California Institute for Research & Education (NCIRE / The Veterans Health Research Institute)                                       | ADNI                                                                                       |
| Chengshi                          | Jin        |                       | PhD              | University of California, San Francisco        | San Francisco, California, USA           | Administrative Core - Northern California Institute for Research & Education (NCIRE / The Veterans Health Research Institute)                                       | ADNI                                                                                       |
| Rachel                            | Nosheny    |                       | PhD              | University of California, San Francisco        | San Francisco, California, USA           | Administrative Core - Northern California Institute for Research & Education (NCIRE / The Veterans Health Research Institute)                                       | ADNI                                                                                       |
| Miriam                            | Ashford    |                       | PhD              | NCIRE / The Veterans Health Research Institute | San Francisco, California, USA           | Administrative Core - Northern California Institute for Research & Education (NCIRE / The Veterans Health Research Institute)                                       | ADNI                                                                                       |

## Supplemental Online Content: Nonauthor Collaborators

\*First name, last name, and suffix (if applicable) are required and will appear in PubMed.

| *First Name and Middle Initial(s) | *Last Name | *Suffix (eg, Jr, III) | Academic Degrees | Institution                                    | Location (city, state/province, country) | Role or Contribution, eg, chair, principal investigator                                                                       | Group (if more than 1 Group listed in the byline) and/or Subgroup (eg, Steering Committee) |
|-----------------------------------|------------|-----------------------|------------------|------------------------------------------------|------------------------------------------|-------------------------------------------------------------------------------------------------------------------------------|--------------------------------------------------------------------------------------------|
| Derek                             | Flenniken  |                       |                  | NCIRE / The Veterans Health Research Institute | San Francisco, California, USA           | Administrative Core - Northern California Institute for Research & Education (NCIRE / The Veterans Health Research Institute) | ADNI                                                                                       |
| Adrienne                          | Kormos     |                       |                  | NCIRE / The Veterans Health Research Institute | San Francisco, California, USA           | Administrative Core - Northern California Institute for Research & Education (NCIRE / The Veterans Health Research Institute) | ADNI                                                                                       |
| Tom                               | Montine    |                       | MD, PhD          | University of Washington (Chair)               | Seattle, Washington, USA                 | Resource Allocation Review Committee                                                                                          | ADNI                                                                                       |
| Michael                           | Rafii      |                       | MD, PhD          | University of Southern California              | Los Angeles, California, USA             | Clinical Core Leaders and Key Personnel                                                                                       | ADNI                                                                                       |
| Rema                              | Raman      |                       | PhD              | University of Southern California              | Los Angeles, California, USA             | Clinical Core Leaders and Key Personnel                                                                                       | ADNI                                                                                       |
| Gustavo                           | Jimenez    |                       | MBS              | University of Southern California              | Los Angeles, California, USA             | Clinical Core Leaders and Key Personnel                                                                                       | ADNI                                                                                       |
| Michael                           | Donohue    |                       | PhD              | University of Southern California              | Los Angeles, California, USA             | Clinical Core Leaders and Key Personnel, Biostatistics Core Leaders and Key Personnel                                         | ADNI                                                                                       |
| Devon                             | Gessert    |                       | BS               | University of Southern California              | Los Angeles, California, USA             | Clinical Core Leaders and Key Personnel                                                                                       | ADNI                                                                                       |
| Jennifer                          | Salazar    |                       | MBS              | University of Southern California              | Los Angeles, California, USA             | Clinical Core Leaders and Key Personnel                                                                                       | ADNI                                                                                       |
| Caileigh                          | Zimmerman  |                       | MS               | University of Southern California              | Los Angeles, California, USA             | Clinical Core Leaders and Key Personnel                                                                                       | ADNI                                                                                       |
| Yuliana                           | Cabrera    |                       | BS               | University of Southern California              | Los Angeles, California, USA             | Clinical Core Leaders and Key Personnel                                                                                       | ADNI                                                                                       |
| Sarah                             | Walter     |                       | MSc              | University of Southern California              | Los Angeles, California, USA             | Clinical Core Leaders and Key Personnel                                                                                       | ADNI                                                                                       |
| Garrett                           | Miller     |                       | MS               | University of Southern California              | Los Angeles, California, USA             | Clinical Core Leaders and Key Personnel                                                                                       | ADNI                                                                                       |

## Supplemental Online Content: Nonauthor Collaborators

\*First name, last name, and suffix (if applicable) are required and will appear in PubMed.

| *First Name and Middle Initial(s) | *Last Name       | *Suffix (eg, Jr, III) | Academic Degrees | Institution                       | Location (city, state/province, country) | Role or Contribution, eg, chair, principal investigator                          | Group (if more than 1 Group listed in the byline) and/or Subgroup (eg, Steering Committee) |
|-----------------------------------|------------------|-----------------------|------------------|-----------------------------------|------------------------------------------|----------------------------------------------------------------------------------|--------------------------------------------------------------------------------------------|
| Godfrey                           | Coker            |                       | MBA, MPH         | University of Southern California | Los Angeles, California, USA             | Clinical Core Leaders and Key Personnel                                          | ADNI                                                                                       |
| Taylor                            | Clanton          |                       | MPH              | University of Southern California | Los Angeles, California, USA             | Clinical Core Leaders and Key Personnel                                          | ADNI                                                                                       |
| Lindsey                           | Hergesheimer     |                       | BS               | University of Southern California | Los Angeles, California, USA             | Clinical Core Leaders and Key Personnel                                          | ADNI                                                                                       |
| Stephanie                         | Smith            |                       | BS               | University of Southern California | Los Angeles, California, USA             | Clinical Core Leaders and Key Personnel                                          | ADNI                                                                                       |
| Olusegun                          | Adegoke          |                       | MSc              | University of Southern California | Los Angeles, California, USA             | Clinical Core Leaders and Key Personnel                                          | ADNI                                                                                       |
| Payam                             | Mahboubi         |                       | MPH              | University of Southern California | Los Angeles, California, USA             | Clinical Core Leaders and Key Personnel                                          | ADNI                                                                                       |
| Shelley                           | Moore            |                       | BA               | University of Southern California | Los Angeles, California, USA             | Clinical Core Leaders and Key Personnel                                          | ADNI                                                                                       |
| Jeremy                            | Pizzola          |                       | BA               | University of Southern California | Los Angeles, California, USA             | Clinical Core Leaders and Key Personnel                                          | ADNI                                                                                       |
| Elizabeth                         | Shaffer          |                       | BS               | University of Southern California | Los Angeles, California, USA             | Clinical Core Leaders and Key Personnel                                          | ADNI                                                                                       |
| Brittany                          | Sloan            |                       | BA               | University of Southern California | Los Angeles, California, USA             | Clinical Core Leaders and Key Personnel                                          | ADNI                                                                                       |
| Danielle                          | Harvey           |                       | PhD              | University of California, Davis   | Davis, California, USA                   | Biostatistics Core Leaders and Key Personnel, MRI Core Leaders and Key Personnel | ADNI                                                                                       |
| Arvin                             | Forghanian-Arani |                       | PhD              | Mayo Clinic                       | Rochester, Minnesota, USA                | MRI Core Leaders and Key Personnel                                               | ADNI                                                                                       |
| Bret                              | Borowski         |                       | RTR              | Mayo Clinic                       | Rochester, Minnesota, USA                | MRI Core Leaders and Key Personnel                                               | ADNI                                                                                       |
| Chad                              | Ward             |                       |                  | Mayo Clinic                       | Rochester, Minnesota, USA                | MRI Core Leaders and Key Personnel                                               | ADNI                                                                                       |
| Christopher                       | Schwarz          |                       | PhD              | Mayo Clinic                       | Rochester, Minnesota, USA                | MRI Core Leaders and Key Personnel                                               | ADNI                                                                                       |
| David                             | Jones            |                       | MD               | Mayo Clinic                       | Rochester, Minnesota, USA                | MRI Core Leaders and Key Personnel                                               | ADNI                                                                                       |

## Supplemental Online Content: Nonauthor Collaborators

\*First name, last name, and suffix (if applicable) are required and will appear in PubMed.

| *First Name and Middle Initial(s) | *Last Name   | *Suffix (eg, Jr, III) | Academic Degrees | Institution                                          | Location (city, state/province, country) | Role or Contribution, eg, chair, principal investigator | Group (if more than 1 Group listed in the byline) and/or Subgroup (eg, Steering Committee) |
|-----------------------------------|--------------|-----------------------|------------------|------------------------------------------------------|------------------------------------------|---------------------------------------------------------|--------------------------------------------------------------------------------------------|
| Jeff                              | Gunter       |                       | PhD              | Mayo Clinic                                          | Rochester, Minnesota, USA                | MRI Core Leaders and Key Personnel                      | ADNI                                                                                       |
| Kejal                             | Kantarci     |                       | MD               | Mayo Clinic                                          | Rochester, Minnesota, USA                | MRI Core Leaders and Key Personnel                      | ADNI                                                                                       |
| Matthew                           | Senjem       |                       | MS               | Mayo Clinic                                          | Rochester, Minnesota, USA                | MRI Core Leaders and Key Personnel                      | ADNI                                                                                       |
| Prashanthi                        | Vemuri       |                       | PhD              | Mayo Clinic                                          | Rochester, Minnesota, USA                | MRI Core Leaders and Key Personnel                      | ADNI                                                                                       |
| Robert                            | Reid         |                       | PhD              | Mayo Clinic                                          | Rochester, Minnesota, USA                | MRI Core Leaders and Key Personnel                      | ADNI                                                                                       |
| Nick C.                           | Fox          |                       | MD               | University College London                            | London, UK                               | MRI Core Leaders and Key Personnel                      | ADNI                                                                                       |
| Ian                               | Malone       |                       | PhD              | University College London                            | London, UK                               | MRI Core Leaders and Key Personnel                      | ADNI                                                                                       |
| Paul                              | Thompson     |                       | PhD              | University of Southern California School of Medicine | Los Angeles, California, USA             | MRI Core Leaders and Key Personnel                      | ADNI                                                                                       |
| Sophia I.                         | Thomopoulos  |                       | BS               | University of Southern California School of Medicine | Los Angeles, California, USA             | MRI Core Leaders and Key Personnel                      | ADNI                                                                                       |
| Talia M.                          | Nir          |                       | PhD              | University of Southern California School of Medicine | Los Angeles, California, USA             | MRI Core Leaders and Key Personnel                      | ADNI                                                                                       |
| Neda                              | Jahanshad    |                       | PhD              | University of Southern California School of Medicine | Los Angeles, California, USA             | MRI Core Leaders and Key Personnel                      | ADNI                                                                                       |
| Charles                           | DeCarli      |                       | MD               | University of California, Davis                      | Davis, California, USA                   | MRI Core Leaders and Key Personnel, Investigator        | ADNI                                                                                       |
| Alexander                         | Knaack       |                       | MS               | University of California, Davis                      | Davis, California, USA                   | MRI Core Leaders and Key Personnel                      | ADNI                                                                                       |
| Evan                              | Fletcher     |                       | PhD              | University of California, Davis                      | Davis, California, USA                   | MRI Core Leaders and Key Personnel, Investigator        | ADNI                                                                                       |
| Duygu                             | Tosun-Turgut |                       | PhD              | University of California, San Francisco              | San Francisco, California, USA           | MRI Core Leaders and Key Personnel                      | ADNI                                                                                       |
| Stephanie Rossi                   | Chen         |                       | BA               | NCIRE / The Veterans Health Research Institute       | San Francisco, California, USA           | MRI Core Leaders and Key Personnel                      | ADNI                                                                                       |

## Supplemental Online Content: Nonauthor Collaborators

\*First name, last name, and suffix (if applicable) are required and will appear in PubMed.

| *First Name and Middle Initial(s) | *Last Name      | *Suffix (eg, Jr, III) | Academic Degrees | Institution                                             | Location (city, state/province, country) | Role or Contribution, eg, chair, principal investigator                        | Group (if more than 1 Group listed in the byline) and/or Subgroup (eg, Steering Committee) |
|-----------------------------------|-----------------|-----------------------|------------------|---------------------------------------------------------|------------------------------------------|--------------------------------------------------------------------------------|--------------------------------------------------------------------------------------------|
| Mark                              | Choe            |                       | BS               | NCIRE / The Veterans Health Research Institute          | San Francisco, California, USA           | MRI Core Leaders and Key Personnel                                             | ADNI                                                                                       |
| Karen                             | Crawford        |                       |                  | University of Southern California School of Medicine    | Los Angeles, California, USA             | MRI Core Leaders and Key Personnel, Informatics Core Leaders and Key Personnel | ADNI                                                                                       |
| Paul A.                           | Yushkevich      |                       | PhD              | University of Pennsylvania                              | Philadelphia, Pennsylvania, USA          | MRI Core Leaders and Key Personnel                                             | ADNI                                                                                       |
| Sandhitsu                         | Das             |                       | PhD              | University of Pennsylvania                              | Philadelphia, Pennsylvania, USA          | MRI Core Leaders and Key Personnel                                             | ADNI                                                                                       |
| Robert A.                         | Koeppe          |                       | PhD              | University of Michigan                                  | Ann Arbor, Michigan, USA                 | PET Core Leaders and Key Personnel                                             | ADNI                                                                                       |
| Eric M.                           | Reiman          |                       | MD               | Banner Alzheimer's Institute                            | Tucson, Arizona, USA                     | PET Core Leaders and Key Personnel                                             | ADNI                                                                                       |
| Kewei                             | Chen            |                       | PhD              | Banner Alzheimer's Institute                            | Tucson, Arizona, USA                     | PET Core Leaders and Key Personnel                                             | ADNI                                                                                       |
| Chet                              | Mathis          |                       | MD               | University of Pittsburgh                                | Pittsburgh, Pennsylvania, USA            | PET Core Leaders and Key Personnel                                             | ADNI                                                                                       |
| Susan                             | Landau          |                       | PhD              | University of California, Berkeley                      | Berkeley, CA, USA                        | PET Core Leaders and Key Personnel                                             | ADNI                                                                                       |
| Nigel J.                          | Cairns          |                       | PhD, FRCPATH     | Washington University St. Louis                         | St. Louis, Missouri, USA                 | Neuropathology Core Leaders and Key Personnel                                  | ADNI                                                                                       |
| Erin                              | Householder     |                       | MS               | Washington University St. Louis                         | St. Louis, Missouri, USA                 | Neuropathology Core Leaders and Key Personnel                                  | ADNI                                                                                       |
| Erin                              | Franklin        |                       | MS               | Washington University St. Louis                         | St. Louis, Missouri, USA                 | Neuropathology Core Leaders and Key Personnel                                  | ADNI                                                                                       |
| Haley                             | Bernhardt       |                       | BA, R. EEG T     | Washington University St. Louis                         | St. Louis, Missouri, USA                 | Neuropathology Core Leaders and Key Personnel                                  | ADNI                                                                                       |
| Lisa                              | Taylor-Reinwald |                       | BA, HTL (ASCP)   | Washington University St. Louis                         | St. Louis, Missouri, USA                 | Neuropathology Core Leaders and Key Personnel                                  | ADNI                                                                                       |
| Magdalena                         | Korecka         |                       | PhD              | Perelman School of Medicine, University of Pennsylvania | Philadelphia, Pennsylvania, USA          | Biomarkers Core Leaders and Key Personnel                                      | ADNI                                                                                       |
| Michael                           | Figurski        |                       | PhD              | Perelman School of Medicine, University of Pennsylvania | Philadelphia, Pennsylvania, USA          | Biomarkers Core Leaders and Key Personnel                                      | ADNI                                                                                       |



## Supplemental Online Content: Nonauthor Collaborators

\*First name, last name, and suffix (if applicable) are required and will appear in PubMed.

| *First Name and Middle Initial(s) | *Last Name | *Suffix (eg, Jr, III) | Academic Degrees | Institution                                                                  | Location (city, state/province, country)                 | Role or Contribution, eg, chair, principal investigator    | Group (if more than 1 Group listed in the byline) and/or Subgroup (eg, Steering Committee) |
|-----------------------------------|------------|-----------------------|------------------|------------------------------------------------------------------------------|----------------------------------------------------------|------------------------------------------------------------|--------------------------------------------------------------------------------------------|
| Scott                             | Neu        |                       | PhD              | University of Southern California                                            | Los Angeles, California, USA                             | Informatics Core Leaders and Key Personnel                 | ADNI                                                                                       |
| Kwangsik                          | Nho        |                       | PhD              | Indiana University School of Medicine                                        | Indianapolis, Indiana, USA                               | Genetics Core Leaders and Key Personnel                    | ADNI                                                                                       |
| Shannon L.                        | Risacher   |                       | PhD              | Indiana University School of Medicine                                        | Indianapolis, Indiana, USA                               | Genetics Core Leaders and Key Personnel                    | ADNI                                                                                       |
| Liana G.                          | Apostolova |                       | MD               | Indiana University School of Medicine, University of California, Los Angeles | Indianapolis, Indiana, USA, Los Angeles, California, USA | Genetics Core Leaders and Key Personnel, Past Investigator | ADNI                                                                                       |
| Li                                | Shen       |                       | PhD              | UPenn School of Medicine                                                     | Philadelphia, Pennsylvania, USA                          | Genetics Core Leaders and Key Personnel                    | ADNI                                                                                       |
| Tatiana M.                        | Foroud     |                       | PhD              | NCRAD/Indiana University School of Medicine                                  | Indianapolis, Indiana, USA                               | Genetics Core Leaders and Key Personnel                    | ADNI                                                                                       |
| Kelly                             | Nudelman   |                       | PhD              | NCRAD/Indiana University School of Medicine                                  | Indianapolis, Indiana, USA                               | Genetics Core Leaders and Key Personnel                    | ADNI                                                                                       |
| Kelley                            | Faber      |                       | MS, CCRC         | NCRAD/Indiana University School of Medicine                                  | Indianapolis, Indiana, USA                               | Genetics Core Leaders and Key Personnel                    | ADNI                                                                                       |
| Kristi                            | Wilmes     |                       | MS, CCRP         | NCRAD/Indiana University School of Medicine                                  | Indianapolis, Indiana, USA                               | Genetics Core Leaders and Key Personnel                    | ADNI                                                                                       |
| Leon                              | Thal       |                       | MD               | University of California, San Diego                                          | San Diego, California, USA                               | Initial Concept Planning & Development                     | ADNI                                                                                       |
| Lisa C.                           | Silbert    |                       | MD               | Oregon Health & Science University                                           | Portland, Oregon, USA                                    | Investigator                                               | ADNI                                                                                       |
| Betty                             | Lind       |                       | BS               | Oregon Health & Science University                                           | Portland, Oregon, USA                                    | Investigator                                               | ADNI                                                                                       |
| Rachel                            | Crissey    |                       |                  | Oregon Health & Science University                                           | Portland, Oregon, USA                                    | Investigator                                               | ADNI                                                                                       |
| Jeffrey A.                        | Kaye       |                       | MD               | Oregon Health & Science University                                           | Portland, Oregon, USA                                    | Past Investigator                                          | ADNI                                                                                       |
| Raina                             | Carter     |                       | BA               | Oregon Health & Science University                                           | Portland, Oregon, USA                                    | Past Investigator                                          | ADNI                                                                                       |
| Sara                              | Dolen      |                       | BS               | Oregon Health & Science University                                           | Portland, Oregon, USA                                    | Past Investigator                                          | ADNI                                                                                       |

## Supplemental Online Content: Nonauthor Collaborators

\*First name, last name, and suffix (if applicable) are required and will appear in PubMed.

| *First Name and Middle Initial(s) | *Last Name   | *Suffix (eg, Jr, III) | Academic Degrees | Institution                                                             | Location (city, state/province, country)             | Role or Contribution, eg, chair, principal investigator | Group (if more than 1 Group listed in the byline) and/or Subgroup (eg, Steering Committee) |
|-----------------------------------|--------------|-----------------------|------------------|-------------------------------------------------------------------------|------------------------------------------------------|---------------------------------------------------------|--------------------------------------------------------------------------------------------|
| Joseph                            | Quinn        |                       | MD               | Oregon Health & Science University                                      | Portland, Oregon, USA                                | Past Investigator                                       | ADNI                                                                                       |
| Lon S.                            | Schneider    |                       | MD               | University of Southern California                                       | Los Angeles, California, USA                         | Investigator                                            | ADNI                                                                                       |
| Sonia                             | Pawluczyk    |                       | MD               | University of Southern California                                       | Los Angeles, California, USA                         | Investigator                                            | ADNI                                                                                       |
| Mauricio                          | Becerra      |                       | MD               | University of Southern California                                       | Los Angeles, California, USA                         | Investigator                                            | ADNI                                                                                       |
| Liberty                           | Teodoro      |                       | RN               | University of Southern California                                       | Los Angeles, California, USA                         | Investigator                                            | ADNI                                                                                       |
| Karen                             | Dagerman     |                       | MS               | University of Southern California                                       | Los Angeles, California, USA                         | Investigator                                            | ADNI                                                                                       |
| Bryan M.                          | Spann        |                       | DO, PhD          | University of Southern California, Banner Sun Health Research Institute | Los Angeles, California, USA, Sun City, Arizona, USA | Past Investigator, Investigator                         | ADNI                                                                                       |
| James                             | Brewer       |                       | MD, PhD          | University of California, San Diego                                     | San Diego, California, USA                           | Investigator                                            | ADNI                                                                                       |
| Helen                             | Vanderswag   |                       | RN               | University of California, San Diego                                     | San Diego, California, USA                           | Investigator                                            | ADNI                                                                                       |
| Adam                              | Fleisher     |                       | MD               | University of California, San Diego                                     | San Diego, California, USA                           | Past Investigator                                       | ADNI                                                                                       |
| Jaimie                            | Ziolkowski   |                       | MA, BS, TLLP     | University of Michigan                                                  | Ann Arbor, Michigan, USA                             | Investigator                                            | ADNI                                                                                       |
| Judith L.                         | Heidebrink   |                       | MD, MS           | University of Michigan                                                  | Ann Arbor, Michigan, USA                             | Investigator                                            | ADNI                                                                                       |
| Lisa                              | Zbizek-Nulph |                       | MS, CCRP         | University of Michigan                                                  | Ann Arbor, Michigan, USA                             | Investigator                                            | ADNI                                                                                       |
| Joanne L.                         | Lord         |                       | LPN, BA, CCRC    | University of Michigan                                                  | Ann Arbor, Michigan, USA                             | Past Investigator                                       | ADNI                                                                                       |
| Sara S.                           | Mason        |                       | RN               | Mayo Clinic, Rochester                                                  | Rochester, Minnesota, USA                            | Investigator                                            | ADNI                                                                                       |
| Colleen S.                        | Albers       |                       | RN               | Mayo Clinic, Rochester                                                  | Rochester, Minnesota, USA                            | Investigator                                            | ADNI                                                                                       |

## Supplemental Online Content: Nonauthor Collaborators

\*First name, last name, and suffix (if applicable) are required and will appear in PubMed.

| *First Name and Middle Initial(s) | *Last Name       | *Suffix (eg, Jr, III) | Academic Degrees | Institution                                                                           | Location (city, state/province, country)        | Role or Contribution, eg, chair, principal investigator | Group (if more than 1 Group listed in the byline) and/or Subgroup (eg, Steering Committee) |
|-----------------------------------|------------------|-----------------------|------------------|---------------------------------------------------------------------------------------|-------------------------------------------------|---------------------------------------------------------|--------------------------------------------------------------------------------------------|
| David                             | Knopman          |                       | MD               | Mayo Clinic, Rochester                                                                | Rochester, Minnesota, USA                       | Investigator                                            | ADNI                                                                                       |
| Kris                              | Johnson          |                       | RN               | Mayo Clinic, Rochester                                                                | Rochester, Minnesota, USA                       | Investigator                                            | ADNI                                                                                       |
| Javier                            | Villaneuva-Meyer |                       | MD               | Baylor College of Medicine                                                            | Houston, Texas, USA                             | Investigator                                            | ADNI                                                                                       |
| Valory                            | Pavlik           |                       | PhD              | Baylor College of Medicine                                                            | Houston, Texas, USA                             | Investigator                                            | ADNI                                                                                       |
| Nathaniel                         | Pacini           |                       | MA               | Baylor College of Medicine                                                            | Houston, Texas, USA                             | Investigator                                            | ADNI                                                                                       |
| Ashley                            | Lamb             |                       | MA               | Baylor College of Medicine                                                            | Houston, Texas, USA                             | Investigator                                            | ADNI                                                                                       |
| Joseph S.                         | Kass             |                       | MD, LD, FAAN     | Baylor College of Medicine                                                            | Houston, Texas, USA                             | Investigator                                            | ADNI                                                                                       |
| Rachelle S.                       | Doody            |                       | MD, PhD          | Baylor College of Medicine                                                            | Houston, Texas, USA                             | Past Investigator                                       | ADNI                                                                                       |
| Victoria                          | Shibley          |                       | MS               | Baylor College of Medicine                                                            | Houston, Texas, USA                             | Past Investigator                                       | ADNI                                                                                       |
| Munir                             | Chowdhury        |                       | MBBS, MS         | Baylor College of Medicine                                                            | Houston, Texas, USA                             | Past Investigator                                       | ADNI                                                                                       |
| Susan                             | Rountree         |                       | MD               | Baylor College of Medicine                                                            | Houston, Texas, USA                             | Past Investigator                                       | ADNI                                                                                       |
| Mimi                              | Dang             |                       | MD               | Baylor College of Medicine                                                            | Houston, Texas, USA                             | Past Investigator                                       | ADNI                                                                                       |
| Yaakov                            | Stern            |                       | PhD              | Columbia University Medical Center                                                    | New York, New York, USA                         | Investigator                                            | ADNI                                                                                       |
| Lawrence S.                       | Honig            |                       | MD, PhD          | Columbia University Medical Center                                                    | New York, New York, USA                         | Investigator                                            | ADNI                                                                                       |
| Akiva                             | Mintz            |                       | MD, PhD          | Columbia University Medical Center, Cleveland Clinic Lou Ruvo Center for Brain Health | New York, New York, USA, Las Vegas, Nevada, USA | Investigator, Past Investigator                         | ADNI                                                                                       |
| Beau                              | Ances            |                       | MD, PhD, MSc     | Washington University St. Louis                                                       | St. Louis, Missouri, USA                        | Investigator                                            | ADNI                                                                                       |
| David                             | Winkfield        |                       | BS               | Washington University St. Louis                                                       | St. Louis, Missouri, USA                        | Investigator                                            | ADNI                                                                                       |
| Maria                             | Carroll          |                       | RN, MSN, GCNS-BC | Washington University St. Louis                                                       | St. Louis, Missouri, USA                        | Investigator                                            | ADNI                                                                                       |
| Georgia                           | Stobbs-Cucchi    |                       | RN, CCRP         | Washington University St. Louis                                                       | St. Louis, Missouri, USA                        | Past Investigator                                       | ADNI                                                                                       |

## Supplemental Online Content: Nonauthor Collaborators

\*First name, last name, and suffix (if applicable) are required and will appear in PubMed.

| *First Name and Middle Initial(s) | *Last Name  | *Suffix (eg, Jr, III) | Academic Degrees | Institution                       | Location (city, state/province, country) | Role or Contribution, eg, chair, principal investigator | Group (if more than 1 Group listed in the byline) and/or Subgroup (eg, Steering Committee) |
|-----------------------------------|-------------|-----------------------|------------------|-----------------------------------|------------------------------------------|---------------------------------------------------------|--------------------------------------------------------------------------------------------|
| Angela                            | Oliver      |                       | RN, CSN, MSG     | Washington University St. Louis   | St. Louis, Missouri, USA                 | Past Investigator                                       | ADNI                                                                                       |
| Mary L.                           | Creech      |                       | RN, MSW          | Washington University St. Louis   | St. Louis, Missouri, USA                 | Past Investigator                                       | ADNI                                                                                       |
| Mark A.                           | Mintun      |                       | MD               | Washington University St. Louis   | St. Louis, Missouri, USA                 | Past Investigator                                       | ADNI                                                                                       |
| Stacy                             | Schneider   |                       | APRN, BC, GNP    | Washington University St. Louis   | St. Louis, Missouri, USA                 | Past Investigator                                       | ADNI                                                                                       |
| David                             | Geldmacher  |                       | MD               | University of Alabama, Birmingham | Birmingham, Alabama, USA                 | Investigator                                            | ADNI                                                                                       |
| Marissa Natelson                  | Love        |                       | MD               | University of Alabama, Birmingham | Birmingham, Alabama, USA                 | Investigator                                            | ADNI                                                                                       |
| Randall                           | Griffith    |                       | PhD, ABPP        | University of Alabama, Birmingham | Birmingham, Alabama, USA                 | Past Investigator                                       | ADNI                                                                                       |
| David                             | Clark       |                       | MD               | University of Alabama, Birmingham | Birmingham, Alabama, USA                 | Past Investigator                                       | ADNI                                                                                       |
| John                              | Brockington |                       | MD               | University of Alabama, Birmingham | Birmingham, Alabama, USA                 | Past Investigator                                       | ADNI                                                                                       |
| Daniel                            | Marson      |                       | JD, PhD          | University of Alabama, Birmingham | Birmingham, Alabama, USA                 | Past Investigator                                       | ADNI                                                                                       |
| Hillel                            | Grossman    |                       | MD               | Mount Sinai School of Medicine    | New York, New York, USA                  | Investigator                                            | ADNI                                                                                       |
| Martin A.                         | Goldstein   |                       | MD               | Mount Sinai School of Medicine    | New York, New York, USA                  | Investigator                                            | ADNI                                                                                       |
| Jonathan                          | Greenberg   |                       | BA               | Mount Sinai School of Medicine    | New York, New York, USA                  | Investigator                                            | ADNI                                                                                       |
| Effie                             | Mitsis      |                       | PhD              | Mount Sinai School of Medicine    | New York, New York, USA                  | Past Investigator                                       | ADNI                                                                                       |
| Raj C.                            | Shah        |                       | MD               | Rush University Medical Center    | Chicago, Illinois, USA                   | Investigator                                            | ADNI                                                                                       |
| Melissa                           | Lamar       |                       | PhD              | Rush University Medical Center    | Chicago, Illinois, USA                   | Investigator                                            | ADNI                                                                                       |
| Patricia                          | Samuels     |                       |                  | Rush University Medical Center    | Chicago, Illinois, USA                   | Investigator                                            | ADNI                                                                                       |
| Ranjan                            | Duara       |                       | MD               | Wien Center                       | Miami Beach, Florida, USA                | Investigator                                            | ADNI                                                                                       |

## Supplemental Online Content: Nonauthor Collaborators

\*First name, last name, and suffix (if applicable) are required and will appear in PubMed.

| *First Name and Middle Initial(s) | *Last Name  | *Suffix (eg, Jr, III) | Academic Degrees | Institution                                                        | Location (city, state/province, country) | Role or Contribution, eg, chair, principal investigator | Group (if more than 1 Group listed in the byline) and/or Subgroup (eg, Steering Committee) |
|-----------------------------------|-------------|-----------------------|------------------|--------------------------------------------------------------------|------------------------------------------|---------------------------------------------------------|--------------------------------------------------------------------------------------------|
| Maria T.                          | Greig-Custo |                       | MD               | Wien Center                                                        | Miami Beach, Florida, USA                | Investigator                                            | ADNI                                                                                       |
| Rosemarie                         | Rodriguez   |                       | PhD              | Wien Center                                                        | Miami Beach, Florida, USA                | Investigator                                            | ADNI                                                                                       |
| Marilyn                           | Albert      |                       | PhD              | John Hopkins University                                            | Baltimore, Maryland, USA                 | Investigator                                            | ADNI                                                                                       |
| Chiadi                            | Onyike      |                       | MD               | John Hopkins University                                            | Baltimore, Maryland, USA                 | Investigator                                            | ADNI                                                                                       |
| Leonie                            | Farrington  |                       | RN               | John Hopkins University                                            | Baltimore, Maryland, USA                 | Investigator                                            | ADNI                                                                                       |
| Scott                             | Rudow       |                       | BS               | John Hopkins University                                            | Baltimore, Maryland, USA                 | Investigator                                            | ADNI                                                                                       |
| Rottislav                         | Brichko     |                       | BS               | John Hopkins University                                            | Baltimore, Maryland, USA                 | Investigator                                            | ADNI                                                                                       |
| Stephanie                         | Kielb       |                       | BS               | John Hopkins University                                            | Baltimore, Maryland, USA                 | Past Investigator                                       | ADNI                                                                                       |
| Amanda                            | Smith       |                       | MD               | University of South Florida: USF Health Byrd Alzheimer's Institute | Tampa, Florida, USA                      | Investigator                                            | ADNI                                                                                       |
| Balebail Ashok                    | Raj         |                       | MD               | University of South Florida: USF Health Byrd Alzheimer's Institute | Tampa, Florida, USA                      | Past Investigator                                       | ADNI                                                                                       |
| Kristin                           | Fargher     |                       | MD               | University of South Florida: USF Health Byrd Alzheimer's Institute | Tampa, Florida, USA                      | Past Investigator                                       | ADNI                                                                                       |
| Martin                            | Sadowski    |                       | MD, PhD          | New York University                                                | New York, New York, USA                  | Investigator                                            | ADNI                                                                                       |
| Thomas                            | Wisniewski  |                       | MD               | New York University                                                | New York, New York, USA                  | Investigator                                            | ADNI                                                                                       |
| Melanie                           | Shulman     |                       | MD               | New York University                                                | New York, New York, USA                  | Investigator                                            | ADNI                                                                                       |
| Arline                            | Faustin     |                       | MD               | New York University                                                | New York, New York, USA                  | Investigator                                            | ADNI                                                                                       |
| Julia                             | Rao         |                       | PhD              | New York University                                                | New York, New York, USA                  | Investigator                                            | ADNI                                                                                       |

## Supplemental Online Content: Nonauthor Collaborators

\*First name, last name, and suffix (if applicable) are required and will appear in PubMed.

| *First Name and Middle Initial(s) | *Last Name       | *Suffix (eg, Jr, III) | Academic Degrees | Institution                    | Location (city, state/province, country) | Role or Contribution, eg, chair, principal investigator | Group (if more than 1 Group listed in the byline) and/or Subgroup (eg, Steering Committee) |
|-----------------------------------|------------------|-----------------------|------------------|--------------------------------|------------------------------------------|---------------------------------------------------------|--------------------------------------------------------------------------------------------|
| Karen M.                          | Castro           |                       | BA               | New York University            | New York, New York, USA                  | Investigator                                            | ADNI                                                                                       |
| Anasztasia                        | Ulysse           |                       | BA               | New York University            | New York, New York, USA                  | Investigator                                            | ADNI                                                                                       |
| Shannon                           | Chen             |                       | BA               | New York University            | New York, New York, USA                  | Investigator                                            | ADNI                                                                                       |
| Mohammed O.                       | Sheikh           |                       | MD               | New York University            | New York, New York, USA                  | Past Investigator                                       | ADNI                                                                                       |
| Jamika                            | Singleton-Garvin |                       | CCRP             | New York University            | New York, New York, USA                  | Past Investigator                                       | ADNI                                                                                       |
| P. Murali                         | Doraiswamy       |                       | MBBS, FRCP       | Duke University Medical Center | Durham, North Carolina, USA              | Investigator                                            | ADNI                                                                                       |
| Jeffrey R.                        | Petrella         |                       | MD               | Duke University Medical Center | Durham, North Carolina, USA              | Investigator                                            | ADNI                                                                                       |
| Olga                              | James            |                       | MD               | Duke University Medical Center | Durham, North Carolina, USA              | Investigator                                            | ADNI                                                                                       |
| Terence Z.                        | Wong             |                       | MD               | Duke University Medical Center | Durham, North Carolina, USA              | Investigator                                            | ADNI                                                                                       |
| Salvador                          | Borges-Neto      |                       | MD               | Duke University Medical Center | Durham, North Carolina, USA              | Past Investigator                                       | ADNI                                                                                       |
| Jason H.                          | Karlawish        |                       | MD               | University of Pennsylvania     | Philadelphia, Pennsylvania, USA          | Investigator                                            | ADNI                                                                                       |
| David A.                          | Wolk             |                       | MD               | University of Pennsylvania     | Philadelphia, Pennsylvania, USA          | Investigator                                            | ADNI                                                                                       |
| Sanjeev                           | Vaishnavi        |                       | MD               | University of Pennsylvania     | Philadelphia, Pennsylvania, USA          | Investigator                                            | ADNI                                                                                       |
| Christopher M.                    | Clark            |                       | MD               | University of Pennsylvania     | Philadelphia, Pennsylvania, USA          | Past Investigator                                       | ADNI                                                                                       |
| Steven E.                         | Arnold           |                       | MD               | University of Pennsylvania     | Philadelphia, Pennsylvania, USA          | Past Investigator                                       | ADNI                                                                                       |
| Charles D.                        | Smith            |                       | MD               | University of Kentucky         | Lexington, Kentucky, USA                 | Investigator                                            | ADNI                                                                                       |

## Supplemental Online Content: Nonauthor Collaborators

\*First name, last name, and suffix (if applicable) are required and will appear in PubMed.

| *First Name and Middle Initial(s) | *Last Name   | *Suffix (eg, Jr, III) | Academic Degrees | Institution                             | Location (city, state/province, country) | Role or Contribution, eg, chair, principal investigator | Group (if more than 1 Group listed in the byline) and/or Subgroup (eg, Steering Committee) |
|-----------------------------------|--------------|-----------------------|------------------|-----------------------------------------|------------------------------------------|---------------------------------------------------------|--------------------------------------------------------------------------------------------|
| Gregory A.                        | Jicha        |                       | MD, PhD          | University of Kentucky                  | Lexington, Kentucky, USA                 | Investigator                                            | ADNI                                                                                       |
| Riham                             | El Khouli    |                       | MD               | University of Kentucky                  | Lexington, Kentucky, USA                 | Investigator                                            | ADNI                                                                                       |
| Flavius D.                        | Raslau       |                       | MD               | University of Kentucky                  | Lexington, Kentucky, USA                 | Investigator                                            | ADNI                                                                                       |
| Oscar L.                          | Lopez        |                       | MD               | University of Pittsburgh                | Pittsburgh, Pennsylvania, USA            | Investigator                                            | ADNI                                                                                       |
| MaryAnn                           | Oakley       |                       | MA               | University of Pittsburgh                | Pittsburgh, Pennsylvania, USA            | Investigator                                            | ADNI                                                                                       |
| Donna M.                          | Simpson      |                       | CRNP, MPH        | University of Pittsburgh                | Pittsburgh, Pennsylvania, USA            | Investigator                                            | ADNI                                                                                       |
| Anton P.                          | Porsteinsson |                       | MD               | University of Rochester Medical Center  | Rochester, New York, USA                 | Investigator                                            | ADNI                                                                                       |
| Kim                               | Martin       |                       | RN               | University of Rochester Medical Center  | Rochester, New York, USA                 | Investigator                                            | ADNI                                                                                       |
| Nancy                             | Kowalski     |                       | MS, RNC          | University of Rochester Medical Center  | Rochester, New York, USA                 | Investigator                                            | ADNI                                                                                       |
| Melanie                           | Keltz        |                       | RN               | University of Rochester Medical Center  | Rochester, New York, USA                 | Investigator                                            | ADNI                                                                                       |
| Bonnie S.                         | Goldstein    |                       | MS, NP           | University of Rochester Medical Center  | Rochester, New York, USA                 | Past Investigator                                       | ADNI                                                                                       |
| Kelly M.                          | Makino       |                       | BS               | University of Rochester Medical Center  | Rochester, New York, USA                 | Past Investigator                                       | ADNI                                                                                       |
| M. Saleem                         | Ismail       |                       | MD               | University of Rochester Medical Center  | Rochester, New York, USA                 | Past Investigator                                       | ADNI                                                                                       |
| Connie                            | Brand        |                       | RN               | University of Rochester Medical Center  | Rochester, New York, USA                 | Past Investigator                                       | ADNI                                                                                       |
| Gaby                              | Thai         |                       | MD               | University of California Irvine (IMIND) | Irvine, California, USA                  | Investigator                                            | ADNI                                                                                       |
| Aimee                             | Pierce       |                       | MD               | University of California Irvine (IMIND) | Irvine, California, USA                  | Investigator                                            | ADNI                                                                                       |

## Supplemental Online Content: Nonauthor Collaborators

\*First name, last name, and suffix (if applicable) are required and will appear in PubMed.

| *First Name and Middle Initial(s) | *Last Name | *Suffix (eg, Jr, III) | Academic Degrees | Institution                                                            | Location (city, state/province, country) | Role or Contribution, eg, chair, principal investigator | Group (if more than 1 Group listed in the byline) and/or Subgroup (eg, Steering Committee) |
|-----------------------------------|------------|-----------------------|------------------|------------------------------------------------------------------------|------------------------------------------|---------------------------------------------------------|--------------------------------------------------------------------------------------------|
| Beatriz                           | Yanez      |                       | RN               | University of California Irvine (IMIND)                                | Irvine, California, USA                  | Investigator                                            | ADNI                                                                                       |
| Elizabeth                         | Sosa       |                       | PhD              | University of California Irvine (IMIND)                                | Irvine, California, USA                  | Investigator                                            | ADNI                                                                                       |
| Megan                             | Witbracht  |                       | PhD              | University of California Irvine (IMIND)                                | Irvine, California, USA                  | Investigator                                            | ADNI                                                                                       |
| Brendan                           | Kelley     |                       | MD               | University of Texas Southwestern Medical School, Ohio State University | Dallas, Texas, USA, Columbus, Ohio, USA  | Investigator, Past Investigator                         | ADNI                                                                                       |
| Trung                             | Nguyen     |                       | MD               | University of Texas Southwestern Medical School                        | Dallas, Texas, USA                       | Investigator                                            | ADNI                                                                                       |
| Kyle                              | Womack     |                       | MD               | University of Texas Southwestern Medical School                        | Dallas, Texas, USA                       | Investigator                                            | ADNI                                                                                       |
| Dana                              | Mathews    |                       | MD, PhD          | University of Texas Southwestern Medical School                        | Dallas, Texas, USA                       | Past Investigator                                       | ADNI                                                                                       |
| Mary                              | Quiceno    |                       | MD               | University of Texas Southwestern Medical School                        | Dallas, Texas, USA                       | Past Investigator                                       | ADNI                                                                                       |
| Allan I.                          | Levey      |                       | MD, PhD          | Emory University                                                       | Atlanta, Georgia, USA                    | Investigator                                            | ADNI                                                                                       |
| James J.                          | Lah        |                       | MD, PhD          | Emory University                                                       | Atlanta, Georgia, USA                    | Investigator                                            | ADNI                                                                                       |
| Ihab                              | Hajjar     |                       | MD               | Emory University                                                       | Atlanta, Georgia, USA                    | Investigator                                            | ADNI                                                                                       |
| Janet S.                          | Cellar     |                       | DNP, PMHCNS-BC   | Emory University                                                       | Atlanta, Georgia, USA                    | Past Investigator                                       | ADNI                                                                                       |
| Jeffrey M.                        | Burns      |                       | MD               | University of Kansas, Medical Center                                   | Kansas City, Kansas, USA                 | Investigator                                            | ADNI                                                                                       |
| Russell H.                        | Swerdlow   |                       | MD               | University of Kansas, Medical Center                                   | Kansas City, Kansas, USA                 | Investigator                                            | ADNI                                                                                       |
| William M.                        | Brooks     |                       | PhD              | University of Kansas, Medical Center                                   | Kansas City, Kansas, USA                 | Investigator                                            | ADNI                                                                                       |
| Daniel H.S.                       | Silverman  |                       | MD, PhD          | University of California, Los Angeles                                  | Los Angeles, California, USA             | Investigator                                            | ADNI                                                                                       |
| Sarah                             | Kremen     |                       | MD               | University of California, Los Angeles                                  | Los Angeles, California, USA             | Investigator                                            | ADNI                                                                                       |



## Supplemental Online Content: Nonauthor Collaborators

\*First name, last name, and suffix (if applicable) are required and will appear in PubMed.

| *First Name and Middle Initial(s) | *Last Name    | *Suffix (eg, Jr, III) | Academic Degrees     | Institution                           | Location (city, state/province, country) | Role or Contribution, eg, chair, principal investigator | Group (if more than 1 Group listed in the byline) and/or Subgroup (eg, Steering Committee) |
|-----------------------------------|---------------|-----------------------|----------------------|---------------------------------------|------------------------------------------|---------------------------------------------------------|--------------------------------------------------------------------------------------------|
| Kathleen                          | Tingus        |                       | PhD                  | University of California, Los Angeles | Los Angeles, California, USA             | Past Investigator                                       | ADNI                                                                                       |
| Po H.                             | Lu            |                       | PsyD                 | University of California, Los Angeles | Los Angeles, California, USA             | Past Investigator                                       | ADNI                                                                                       |
| George                            | Bartzokis     |                       | MD                   | University of California, Los Angeles | Los Angeles, California, USA             | Past Investigator                                       | ADNI                                                                                       |
| Ellen                             | Woo           |                       | PhD                  | University of California, Los Angeles | Los Angeles, California, USA             | Past Investigator                                       | ADNI                                                                                       |
| Edmond                            | Teng          |                       | MD, PhD              | University of California, Los Angeles | Los Angeles, California, USA             | Past Investigator                                       | ADNI                                                                                       |
| Neill R.                          | Graff-Radford |                       | MBBCH, FRCP (London) | Mayo Clinic, Jacksonville             | Jacksonville, Florida, USA               | Investigator                                            | ADNI                                                                                       |
| Francine                          | Parfitt       |                       | MSH, CCRC            | Mayo Clinic, Jacksonville             | Jacksonville, Florida, USA               | Investigator                                            | ADNI                                                                                       |
| Kim                               | Poki-Walker   |                       | BA                   | Mayo Clinic, Jacksonville             | Jacksonville, Florida, USA               | Investigator                                            | ADNI                                                                                       |
| Martin R.                         | Farlow        |                       | MD                   | Indiana University                    | Bloomington, Indiana, USA                | Investigator                                            | ADNI                                                                                       |
| Ann Marie                         | Hake          |                       | MD                   | Indiana University                    | Bloomington, Indiana, USA                | Past Investigator                                       | ADNI                                                                                       |
| Brandy R.                         | Matthews      |                       | MD                   | Indiana University                    | Bloomington, Indiana, USA                | Past Investigator                                       | ADNI                                                                                       |
| Jared R.                          | Brosch        |                       | MD                   | Indiana University                    | Bloomington, Indiana, USA                | Investigator                                            | ADNI                                                                                       |
| Scott                             | Herring       |                       | RN, CCRC             | Indiana University                    | Bloomington, Indiana, USA                | Investigator                                            | ADNI                                                                                       |
| Christopher H.                    | van Dyck      |                       | MD                   | Yale University School of Medicine    | New Haven, Connecticut, USA              | Investigator                                            | ADNI                                                                                       |
| Adam P.                           | Mecca         |                       | MD, PhD              | Yale University School of Medicine    | New Haven, Connecticut, USA              | Investigator                                            | ADNI                                                                                       |
| Susan P.                          | Good          |                       | APRN                 | Yale University School of Medicine    | New Haven, Connecticut, USA              | Investigator                                            | ADNI                                                                                       |

## Supplemental Online Content: Nonauthor Collaborators

\*First name, last name, and suffix (if applicable) are required and will appear in PubMed.

| *First Name and Middle Initial(s) | *Last Name | *Suffix (eg, Jr, III) | Academic Degrees    | Institution                                         | Location (city, state/province, country) | Role or Contribution, eg, chair, principal investigator | Group (if more than 1 Group listed in the byline) and/or Subgroup (eg, Steering Committee) |
|-----------------------------------|------------|-----------------------|---------------------|-----------------------------------------------------|------------------------------------------|---------------------------------------------------------|--------------------------------------------------------------------------------------------|
| Martha G.                         | MacAvoy    |                       | PhD                 | Yale University School of Medicine                  | New Haven, Connecticut, USA              | Investigator                                            | ADNI                                                                                       |
| Richard E.                        | Carson     |                       | PhD                 | Yale University School of Medicine                  | New Haven, Connecticut, USA              | Investigator                                            | ADNI                                                                                       |
| Pradeep                           | Varma      |                       | MD                  | Yale University School of Medicine                  | New Haven, Connecticut, USA              | Investigator                                            | ADNI                                                                                       |
| Howard                            | Chertkow   |                       | MD                  | McGill University, Montreal-Jewish General Hospital | Montreal, Quebec, Canada                 | Investigator                                            | ADNI                                                                                       |
| Susan                             | Vaitekunis |                       | MD                  | McGill University, Montreal-Jewish General Hospital | Montreal, Quebec, Canada                 | Investigator                                            | ADNI                                                                                       |
| Chris                             | Hosein     |                       | Med                 | McGill University, Montreal-Jewish General Hospital | Montreal, Quebec, Canada                 | Investigator                                            | ADNI                                                                                       |
| Sandra                            | Black      |                       | MD, FRCPC           | Sunnybrook Health Sciences, Ontario                 | Toronto, Ontario, Canada                 | Investigator                                            | ADNI                                                                                       |
| Bojana                            | Stefanovic |                       | PhD                 | Sunnybrook Health Sciences, Ontario                 | Toronto, Ontario, Canada                 | Investigator                                            | ADNI                                                                                       |
| Chris (Chinthaka)                 | Heyn       |                       | BSC, PhD, MD, FRCPC | Sunnybrook Health Sciences, Ontario                 | Toronto, Ontario, Canada                 | Investigator                                            | ADNI                                                                                       |
| Ging-Yuek Robin                   | Hsiung     |                       | MD, MHSC, FRCPC     | U.B.C. Clinic for AD & Related Disorders            | Vancouver, British Columbia, Canada      | Investigator                                            | ADNI                                                                                       |
| Ellen                             | Kim        |                       | BA                  | U.B.C. Clinic for AD & Related Disorders            | Vancouver, British Columbia, Canada      | Investigator                                            | ADNI                                                                                       |
| Benita                            | Mudge      |                       | BS                  | U.B.C. Clinic for AD & Related Disorders            | Vancouver, British Columbia, Canada      | Investigator                                            | ADNI                                                                                       |
| Vesna                             | Sossi      |                       | PhD                 | U.B.C. Clinic for AD & Related Disorders            | Vancouver, British Columbia, Canada      | Investigator                                            | ADNI                                                                                       |
| Howard                            | Feldman    |                       | MD, FRCPC           | U.B.C. Clinic for AD & Related Disorders            | Vancouver, British Columbia, Canada      | Past Investigator                                       | ADNI                                                                                       |
| Michele                           | Assaly     |                       | MA                  | U.B.C. Clinic for AD & Related Disorders            | Vancouver, British Columbia, Canada      | Past Investigator                                       | ADNI                                                                                       |

## Supplemental Online Content: Nonauthor Collaborators

\*First name, last name, and suffix (if applicable) are required and will appear in PubMed.

| *First Name and Middle Initial(s) | *Last Name | *Suffix (eg, Jr, III) | Academic Degrees | Institution              | Location (city, state/province, country) | Role or Contribution, eg, chair, principal investigator | Group (if more than 1 Group listed in the byline) and/or Subgroup (eg, Steering Committee) |
|-----------------------------------|------------|-----------------------|------------------|--------------------------|------------------------------------------|---------------------------------------------------------|--------------------------------------------------------------------------------------------|
| Elizabeth                         | Finger     |                       | MD               | St. Joseph's Health Care | London, Ontario, Canada                  | Investigator                                            | ADNI                                                                                       |
| Stephen                           | Pasternak  |                       | MD               | St. Joseph's Health Care | London, Ontario, Canada                  | Investigator                                            | ADNI                                                                                       |
| Irina                             | Rachinsky  |                       | MD               | St. Joseph's Health Care | London, Ontario, Canada                  | Investigator                                            | ADNI                                                                                       |
| Andrew                            | Kertesz    |                       | MD               | St. Joseph's Health Care | London, Ontario, Canada                  | Past Investigator                                       | ADNI                                                                                       |
| Dick                              | Drost      |                       | MD               | St. Joseph's Health Care | London, Ontario, Canada                  | Past Investigator                                       | ADNI                                                                                       |
| John                              | Rogers     |                       | MD               | St. Joseph's Health Care | London, Ontario, Canada                  | Past Investigator                                       | ADNI                                                                                       |
| Ian                               | Grant      |                       | MD               | Northwestern University  | Evanston, Illinois, USA                  | Investigator                                            | ADNI                                                                                       |
| Brittanie                         | Muse       |                       | MSPH             | Northwestern University  | Evanston, Illinois, USA                  | Investigator                                            | ADNI                                                                                       |
| Emily                             | Rogalski   |                       | PhD              | Northwestern University  | Evanston, Illinois, USA                  | Investigator                                            | ADNI                                                                                       |
| Jordan                            | Robson     |                       |                  | Northwestern University  | Evanston, Illinois, USA                  | Investigator                                            | ADNI                                                                                       |
| M.-Marsel                         | Mesulam    |                       | MD               | Northwestern University  | Evanston, Illinois, USA                  | Past Investigator                                       | ADNI                                                                                       |
| Diana                             | Kerwin     |                       | MD               | Northwestern University  | Evanston, Illinois, USA                  | Past Investigator                                       | ADNI                                                                                       |
| Chuang-Kuo                        | Wu         |                       | MD, PhD          | Northwestern University  | Evanston, Illinois, USA                  | Past Investigator                                       | ADNI                                                                                       |
| Nancy                             | Johnson    |                       | PhD              | Northwestern University  | Evanston, Illinois, USA                  | Past Investigator                                       | ADNI                                                                                       |
| Kristine                          | Lipowski   |                       | MA               | Northwestern University  | Evanston, Illinois, USA                  | Past Investigator                                       | ADNI                                                                                       |
| Sandra                            | Weintraub  |                       | PhD              | Northwestern University  | Evanston, Illinois, USA                  | Past Investigator                                       | ADNI                                                                                       |

## Supplemental Online Content: Nonauthor Collaborators

\*First name, last name, and suffix (if applicable) are required and will appear in PubMed.

| *First Name and Middle Initial(s) | *Last Name   | *Suffix (eg, Jr, III) | Academic Degrees | Institution                             | Location (city, state/province, country) | Role or Contribution, eg, chair, principal investigator | Group (if more than 1 Group listed in the byline) and/or Subgroup (eg, Steering Committee) |
|-----------------------------------|--------------|-----------------------|------------------|-----------------------------------------|------------------------------------------|---------------------------------------------------------|--------------------------------------------------------------------------------------------|
| Borna                             | Bonakdarpour |                       | MD               | Northwestern University                 | Evanston, Illinois, USA                  | Past Investigator                                       | ADNI                                                                                       |
| Nunzio                            | Pomara       |                       | MD               | Nathan Kline Institute                  | Orangeburg, New York, USA                | Investigator                                            | ADNI                                                                                       |
| Raymundo                          | Hernando     |                       | MD               | Nathan Kline Institute                  | Orangeburg, New York, USA                | Investigator                                            | ADNI                                                                                       |
| Antero                            | Sarrael      |                       | MD               | Nathan Kline Institute                  | Orangeburg, New York, USA                | Investigator                                            | ADNI                                                                                       |
| Howard J.                         | Rosen        |                       | MD               | University of California, San Francisco | San Francisco, California, USA           | Investigator                                            | ADNI                                                                                       |
| Bruce L.                          | Miller       |                       | MD               | University of California, San Francisco | San Francisco, California, USA           | Investigator                                            | ADNI                                                                                       |
| David                             | Perry        |                       | MD               | University of California, San Francisco | San Francisco, California, USA           | Investigator                                            | ADNI                                                                                       |
| Raymond Scott                     | Turner       |                       | MD, PhD          | Gerogetown University Medical Center    | Washington DC, USA                       | Investigator                                            | ADNI                                                                                       |
| Kathleen                          | Johnson      |                       | NP               | Gerogetown University Medical Center    | Washington DC, USA                       | Investigator                                            | ADNI                                                                                       |
| Brigid                            | Reynolds     |                       | NP               | Gerogetown University Medical Center    | Washington DC, USA                       | Investigator                                            | ADNI                                                                                       |
| Kelly                             | MCCann       |                       | BA               | Gerogetown University Medical Center    | Washington DC, USA                       | Investigator                                            | ADNI                                                                                       |
| Jessica                           | Poe          |                       | BS               | Gerogetown University Medical Center    | Washington DC, USA                       | Investigator                                            | ADNI                                                                                       |
| Reisa A.                          | Sperling     |                       | MD               | Brigham and Women's Hospital            | Boston, Massachusetts, USA               | Investigator                                            | ADNI                                                                                       |
| Keith A.                          | Johnson      |                       | MD               | Brigham and Women's Hospital            | Boston, Massachusetts, USA               | Investigator                                            | ADNI                                                                                       |
| Gad A.                            | Marshall     |                       | MD               | Brigham and Women's Hospital            | Boston, Massachusetts, USA               | Investigator                                            | ADNI                                                                                       |
| Jerome                            | Yesavage     |                       | MD               | Stanford University                     | Stanford, California, USA                | Investigator                                            | ADNI                                                                                       |

## Supplemental Online Content: Nonauthor Collaborators

\*First name, last name, and suffix (if applicable) are required and will appear in PubMed.

| *First Name and Middle Initial(s) | *Last Name  | *Suffix (eg, Jr, III) | Academic Degrees | Institution                                                                                                            | Location (city, state/province, country)                              | Role or Contribution, eg, chair, principal investigator | Group (if more than 1 Group listed in the byline) and/or Subgroup (eg, Steering Committee) |
|-----------------------------------|-------------|-----------------------|------------------|------------------------------------------------------------------------------------------------------------------------|-----------------------------------------------------------------------|---------------------------------------------------------|--------------------------------------------------------------------------------------------|
| Joy L.                            | Taylor      |                       | PhD              | Stanford University                                                                                                    | Stanford, California, USA                                             | Investigator                                            | ADNI                                                                                       |
| Steven                            | Chao        |                       | MD, PhD          | Stanford University                                                                                                    | Stanford, California, USA                                             | Investigator                                            | ADNI                                                                                       |
| Jaila                             | Coleman     |                       | BA               | Stanford University                                                                                                    | Stanford, California, USA                                             | Investigator                                            | ADNI                                                                                       |
| Jessica D.                        | White       |                       | BA               | Stanford University                                                                                                    | Stanford, California, USA                                             | Past Investigator                                       | ADNI                                                                                       |
| Barton                            | Lane        |                       | MD               | Stanford University                                                                                                    | Stanford, California, USA                                             | Past Investigator                                       | ADNI                                                                                       |
| Allyson                           | Rosen       |                       | PhD              | Stanford University                                                                                                    | Stanford, California, USA                                             | Past Investigator                                       | ADNI                                                                                       |
| Jared                             | Tinklenberg |                       | MD               | Stanford University                                                                                                    | Stanford, California, USA                                             | Past Investigator                                       | ADNI                                                                                       |
| Christine M.                      | Belden      |                       | PsyD             | Banner Sun Health Research Institute                                                                                   | Sun City, Arizona, USA                                                | Investigator                                            | ADNI                                                                                       |
| Alireza                           | Atri        |                       | MD, PhD          | Banner Sun Health Research Institute                                                                                   | Sun City, Arizona, USA                                                | Investigator                                            | ADNI                                                                                       |
| Kelly A.                          | Clark       |                       |                  | Banner Sun Health Research Institute                                                                                   | Sun City, Arizona, USA                                                | Investigator                                            | ADNI                                                                                       |
| Edward                            | Zamrini     |                       | MD               | Banner Sun Health Research Institute                                                                                   | Sun City, Arizona, USA                                                | Past Investigator                                       | ADNI                                                                                       |
| Marwan                            | Sabbagh     |                       | MD               | Banner Sun Health Research Institute, Cleveland Clinic Lou Ruvo Center for Brain Health, Barrow Neurological Institute | Sun City, Arizona, USA, Las Vegas, Nevada, USA, Phoenix, Arizona, USA | Past Investigator, Investigator, Past Investigator      | ADNI                                                                                       |
| Ronald                            | Killiany    |                       | PhD              | Boston University                                                                                                      | Boston, Massachusetts, USA                                            | Investigator                                            | ADNI                                                                                       |
| Robert                            | Stern       |                       | PhD              | Boston University                                                                                                      | Boston, Massachusetts, USA                                            | Investigator                                            | ADNI                                                                                       |
| Jesse                             | Mez         |                       | MD, MS           | Boston University                                                                                                      | Boston, Massachusetts, USA                                            | Investigator                                            | ADNI                                                                                       |

## Supplemental Online Content: Nonauthor Collaborators

\*First name, last name, and suffix (if applicable) are required and will appear in PubMed.

| *First Name and Middle Initial(s) | *Last Name | *Suffix (eg, Jr, III) | Academic Degrees | Institution                                | Location (city, state/province, country) | Role or Contribution, eg, chair, principal investigator | Group (if more than 1 Group listed in the byline) and/or Subgroup (eg, Steering Committee) |
|-----------------------------------|------------|-----------------------|------------------|--------------------------------------------|------------------------------------------|---------------------------------------------------------|--------------------------------------------------------------------------------------------|
| Neil                              | Kowall     |                       | MD               | Boston University                          | Boston, Massachusetts, USA               | Past Investigator                                       | ADNI                                                                                       |
| Andrew E.                         | Budson     |                       | MD               | Boston University                          | Boston, Massachusetts, USA               | Past Investigator                                       | ADNI                                                                                       |
| Thomas O.                         | Obisesan   |                       | MD, MPH          | Howard University                          | Washington DC, USA                       | Investigator                                            | ADNI                                                                                       |
| Oyonumo E.                        | Ntekim     |                       | MD, PhD          | Howard University                          | Washington DC, USA                       | Investigator                                            | ADNI                                                                                       |
| Saba                              | Wolday     |                       | MSc              | Howard University                          | Washington DC, USA                       | Investigator                                            | ADNI                                                                                       |
| Javed I.                          | Khan       |                       | MD               | Howard University                          | Washington DC, USA                       | Investigator                                            | ADNI                                                                                       |
| Evaristus                         | Nwulia     |                       | MD               | Howard University                          | Washington DC, USA                       | Investigator                                            | ADNI                                                                                       |
| Sheeba                            | Nadarajah  |                       | PhD              | Howard University                          | Washington DC, USA                       | Investigator                                            | ADNI                                                                                       |
| Alan                              | Lerner     |                       | MD               | Case Western Reserve University            | Cleveland, Ohio, USA                     | Investigator                                            | ADNI                                                                                       |
| Paula                             | Ogrocki    |                       | PhD              | Case Western Reserve University            | Cleveland, Ohio, USA                     | Investigator                                            | ADNI                                                                                       |
| Curtis                            | Tatsuoka   |                       | PhD              | Case Western Reserve University            | Cleveland, Ohio, USA                     | Investigator                                            | ADNI                                                                                       |
| Parianne                          | Fatica     |                       | BA, CCRC         | Case Western Reserve University            | Cleveland, Ohio, USA                     | Investigator                                            | ADNI                                                                                       |
| Pauline                           | Maillard   |                       | PhD              | University of California, Davis-Sacramento | Sacramento, California, USA              | Investigator                                            | ADNI                                                                                       |
| John                              | Olichney   |                       | MD               | University of California, Davis-Sacramento | Sacramento, California, USA              | Investigator                                            | ADNI                                                                                       |
| Owen                              | Carmichael |                       | PhD              | University of California, Davis-Sacramento | Sacramento, California, USA              | Past Investigator                                       | ADNI                                                                                       |
| Vernice                           | Bates      |                       | MD               | Dent Neurologic Institute                  | Amherst, New York, USA                   | Investigator                                            | ADNI                                                                                       |
| Horacio                           | Capote     |                       | MD               | Dent Neurologic Institute                  | Amherst, New York, USA                   | Investigator                                            | ADNI                                                                                       |
| Michelle                          | Rainka     |                       | PharmD, CCRP     | Dent Neurologic Institute                  | Amherst, New York, USA                   | Investigator                                            | ADNI                                                                                       |
| Michael                           | Borrie     |                       | MB, ChB          | Parkwood Institute                         | London, Ontario, Canada                  | Investigator                                            | ADNI                                                                                       |
| T-Y                               | Lee        |                       | PhD              | Parkwood Institute                         | London, Ontario, Canada                  | Investigator                                            | ADNI                                                                                       |
| Rob                               | Bartha     |                       | PhD              | Parkwood Institute                         | London, Ontario, Canada                  | Investigator                                            | ADNI                                                                                       |

## Supplemental Online Content: Nonauthor Collaborators

\*First name, last name, and suffix (if applicable) are required and will appear in PubMed.

| *First Name and Middle Initial(s) | *Last Name  | *Suffix (eg, Jr, III) | Academic Degrees | Institution                            | Location (city, state/province, country) | Role or Contribution, eg, chair, principal investigator | Group (if more than 1 Group listed in the byline) and/or Subgroup (eg, Steering Committee) |
|-----------------------------------|-------------|-----------------------|------------------|----------------------------------------|------------------------------------------|---------------------------------------------------------|--------------------------------------------------------------------------------------------|
| Sterling                          | Johnson     |                       | PhD              | University of Wisconsin                | Madison, Wisconsin, USA                  | Investigator                                            | ADNI                                                                                       |
| Sanjay                            | Asthana     |                       | MD               | University of Wisconsin                | Madison, Wisconsin, USA                  | Investigator                                            | ADNI                                                                                       |
| Cynthia M.                        | Carlsson    |                       | MD, MS           | University of Wisconsin                | Madison, Wisconsin, USA                  | Investigator                                            | ADNI                                                                                       |
| Allison                           | Perrin      |                       | PhD              | Banner Alzheimer's Institute           | Tucson, Arizona, USA                     | Investigator                                            | ADNI                                                                                       |
| Anna                              | Burke       |                       | PhD              | Banner Alzheimer's Institute           | Tucson, Arizona, USA                     | Past Investigator                                       | ADNI                                                                                       |
| Douglas W.                        | Scharre     |                       | MD               | Ohio State University                  | Columbus, Ohio, USA                      | Investigator                                            | ADNI                                                                                       |
| Maria                             | Kataki      |                       | MD, PhD          | Ohio State University                  | Columbus, Ohio, USA                      | Investigator                                            | ADNI                                                                                       |
| Rawan                             | Tarawneh    |                       | MD               | Ohio State University                  | Columbus, Ohio, USA                      | Investigator                                            | ADNI                                                                                       |
| David                             | Hart        |                       | MD               | Albany Medical College                 | Albany, New York, USA                    | Investigator                                            | ADNI                                                                                       |
| Earl A.                           | Zimmerman   |                       | MD               | Albany Medical College                 | Albany, New York, USA                    | Investigator                                            | ADNI                                                                                       |
| Dzintra                           | Celmins     |                       | MD               | Albany Medical College                 | Albany, New York, USA                    | Investigator                                            | ADNI                                                                                       |
| Delwyn D.                         | Miller      |                       | PharmD, MD       | University of Iowa College of Medicine | Iowa City, Iowa, USA                     | Investigator                                            | ADNI                                                                                       |
| Laura L.                          | Boles Ponto |                       | PhD              | University of Iowa College of Medicine | Iowa City, Iowa, USA                     | Investigator                                            | ADNI                                                                                       |
| Karen Ekstam                      | Smith       |                       | RN               | University of Iowa College of Medicine | Iowa City, Iowa, USA                     | Investigator                                            | ADNI                                                                                       |
| Hristina                          | Koleva      |                       | MD               | University of Iowa College of Medicine | Iowa City, Iowa, USA                     | Investigator                                            | ADNI                                                                                       |
| Hyungsub                          | Shim        |                       | MD               | University of Iowa College of Medicine | Iowa City, Iowa, USA                     | Investigator                                            | ADNI                                                                                       |
| Ki Won                            | Nam         |                       | MD               | University of Iowa College of Medicine | Iowa City, Iowa, USA                     | Past Investigator                                       | ADNI                                                                                       |
| Susan K.                          | Schtulz     |                       | MD               | University of Iowa College of Medicine | Iowa City, Iowa, USA                     | Past Investigator                                       | ADNI                                                                                       |
| Jeff D.                           | Williamson  |                       | MD, MHS          | Wake Forest University Health Sciences | Winston-Salem, North Carolina, USA       | Investigator                                            | ADNI                                                                                       |

## Supplemental Online Content: Nonauthor Collaborators

\*First name, last name, and suffix (if applicable) are required and will appear in PubMed.

| *First Name and Middle Initial(s) | *Last Name | *Suffix (eg, Jr, III) | Academic Degrees | Institution                                       | Location (city, state/province, country) | Role or Contribution, eg, chair, principal investigator | Group (if more than 1 Group listed in the byline) and/or Subgroup (eg, Steering Committee) |
|-----------------------------------|------------|-----------------------|------------------|---------------------------------------------------|------------------------------------------|---------------------------------------------------------|--------------------------------------------------------------------------------------------|
| Suzanne                           | Craft      |                       | PhD              | Wake Forest University Health Sciences            | Winston-Salem, North Carolina, USA       | Investigator                                            | ADNI                                                                                       |
| Jo                                | Cleveland  |                       | MD               | Wake Forest University Health Sciences            | Winston-Salem, North Carolina, USA       | Investigator                                            | ADNI                                                                                       |
| Mia                               | Yang       |                       | MD               | Wake Forest University Health Sciences            | Winston-Salem, North Carolina, USA       | Past Investigator                                       | ADNI                                                                                       |
| Kaycee M.                         | Sink       |                       | MD, MAS          | Wake Forest University Health Sciences            | Winston-Salem, North Carolina, USA       | Past Investigator                                       | ADNI                                                                                       |
| Brian R.                          | Ott        |                       | MD               | Rhode Island Hospital                             | Providence, Rhode Island, USA            | Investigator                                            | ADNI                                                                                       |
| Jonathan                          | Drake      |                       | MD               | Rhode Island Hospital                             | Providence, Rhode Island, USA            | Investigator                                            | ADNI                                                                                       |
| Geoffrey                          | Tremont    |                       | PhD              | Rhode Island Hospital                             | Providence, Rhode Island, USA            | Investigator                                            | ADNI                                                                                       |
| Lori A.                           | Daiello    |                       | Pharm D, ScM     | Rhode Island Hospital                             | Providence, Rhode Island, USA            | Investigator                                            | ADNI                                                                                       |
| Aaron                             | Ritter     |                       | MD               | Cleveland Clinic Lou Ruvo Center for Brain Health | Las Vegas, Nevada, USA                   | Investigator                                            | ADNI                                                                                       |
| Charles                           | Bernick    |                       | MD, MPH          | Cleveland Clinic Lou Ruvo Center for Brain Health | Las Vegas, Nevada, USA                   | Past Investigator                                       | ADNI                                                                                       |
| Donna                             | Munic      |                       | PhD              | Cleveland Clinic Lou Ruvo Center for Brain Health | Las Vegas, Nevada, USA                   | Past Investigator                                       | ADNI                                                                                       |
| Abigail                           | O'Connell  |                       | MS, APRN, FNP-C  | Roper St. Francis Healthcare                      | Charleston, South Carolina, USA          | Investigator                                            | ADNI                                                                                       |
| Jacobo                            | Mintzer    |                       | MD, MBA          | Roper St. Francis Healthcare                      | Charleston, South Carolina, USA          | Investigator                                            | ADNI                                                                                       |
| Arthur                            | Williams   |                       | BS               | Roper St. Francis Healthcare                      | Charleston, South Carolina, USA          | Investigator                                            | ADNI                                                                                       |
| Joseph                            | Masdeu     |                       | PhD              | Houston Methodist Neurological Institute          | Houston, Texas, USA                      | Investigator                                            | ADNI                                                                                       |
| Jiong                             | Shi        |                       | MD, PhD          | Barrow Neurological Institute                     | Phoenix, Arizona, USA                    | Investigator                                            | ADNI                                                                                       |



## Supplemental Online Content: Nonauthor Collaborators

\*First name, last name, and suffix (if applicable) are required and will appear in PubMed.

| *First Name and Middle Initial(s) | *Last Name | *Suffix (eg, Jr, III) | Academic Degrees | Institution                                             | Location (city, state/province, country) | Role or Contribution, eg, chair, principal investigator | Group (if more than 1 Group listed in the byline) and/or Subgroup (eg, Steering Committee) |
|-----------------------------------|------------|-----------------------|------------------|---------------------------------------------------------|------------------------------------------|---------------------------------------------------------|--------------------------------------------------------------------------------------------|
| Angelica                          | Garcia     |                       | BS               | Barrow Neurological Institute                           | Phoenix, Arizona, USA                    | Investigator                                            | ADNI                                                                                       |
| Paul                              | Newhouse   |                       | PhD              | Vanderbilt University Medical Center                    | Nashville, Tennessee, USA                | Investigator                                            | ADNI                                                                                       |
| Steven                            | Potkin     |                       | PhD              | Long Beach VA Neuropsychiatric Research Program         | Long Beach, California, USA              | Investigator                                            | ADNI                                                                                       |
| Steven                            | Salloway   |                       | MD, MS           | Butler Hospital Memory and Aging Program                | Providence, Rhode Island, USA            | Investigator                                            | ADNI                                                                                       |
| Paul                              | Malloy     |                       | PhD              | Butler Hospital Memory and Aging Program                | Providence, Rhode Island, USA            | Investigator                                            | ADNI                                                                                       |
| Stephen                           | Correia    |                       | PhD              | Butler Hospital Memory and Aging Program                | Providence, Rhode Island, USA            | Investigator                                            | ADNI                                                                                       |
| Smita                             | Kittur     |                       | MD               | Neurological Care of CNY                                | East Syracuse, New York, USA             | Past Investigator                                       | ADNI                                                                                       |
| Godfrey D.                        | Pearlson   |                       | MD               | Hartford Hospital, Olin Neuropsychiatry Research Center | Hartford, Connecticut, USA               | Past Investigator                                       | ADNI                                                                                       |
| Karen                             | Blank      |                       | MD               | Hartford Hospital, Olin Neuropsychiatry Research Center | Hartford, Connecticut, USA               | Past Investigator                                       | ADNI                                                                                       |
| Karen                             | Anderson   |                       | RN               | Hartford Hospital, Olin Neuropsychiatry Research Center | Hartford, Connecticut, USA               | Past Investigator                                       | ADNI                                                                                       |
| Laura A.                          | Flashman   |                       | PhD              | Dartmouth-Hitchcock Medical Center                      | Lebanon, New Hampshire, USA              | Past Investigator                                       | ADNI                                                                                       |
| Marc                              | Seltzer    |                       | MD               | Dartmouth-Hitchcock Medical Center                      | Lebanon, New Hampshire, USA              | Past Investigator                                       | ADNI                                                                                       |
| Mary L.                           | Hynes      |                       | RN, MPH          | Dartmouth-Hitchcock Medical Center                      | Lebanon, New Hampshire, USA              | Past Investigator                                       | ADNI                                                                                       |
| Robert B.                         | Santulli   |                       | MD               | Dartmouth-Hitchcock Medical Center                      | Lebanon, New Hampshire, USA              | Past Investigator                                       | ADNI                                                                                       |
| Norman                            | Relkin     |                       | MD, PhD          | Cornell University                                      | Ithaca, New York, USA                    | Past Investigator                                       | ADNI                                                                                       |
| Gloria                            | Chiang     |                       | MD               | Cornell University                                      | Ithaca, New York, USA                    | Past Investigator                                       | ADNI                                                                                       |

## Supplemental Online Content: Nonauthor Collaborators

\*First name, last name, and suffix (if applicable) are required and will appear in PubMed.

| *First Name and Middle Initial(s) | *Last Name | *Suffix (eg, Jr, III) | Academic Degrees | Institution                         | Location (city, state/province, country) | Role or Contribution, eg, chair, principal investigator | Group (if more than 1 Group listed in the byline) and/or Subgroup (eg, Steering Committee) |
|-----------------------------------|------------|-----------------------|------------------|-------------------------------------|------------------------------------------|---------------------------------------------------------|--------------------------------------------------------------------------------------------|
| Athena                            | Lee        |                       | PhD              | Cornell University                  | Ithaca, New York, USA                    | Investigator                                            | ADNI                                                                                       |
| Michael                           | Lin        |                       | MD               | Cornell University                  | Ithaca, New York, USA                    | Past Investigator                                       | ADNI                                                                                       |
| Lisa                              | Ravdin     |                       | PhD              | Cornell University                  | Ithaca, New York, USA                    | Past Investigator                                       | ADNI                                                                                       |
| James                             | Brewer     |                       | MD, PhD          | University of California, San Diego | San Diego, California, USA               | Investigator                                            | ADNI                                                                                       |
| Helen                             | Vanderswag |                       | RN               | University of California, San Diego | San Diego, California, USA               | Investigator                                            | ADNI                                                                                       |
| Adam                              | Fleisher   |                       | MD               | University of California, San Diego | San Diego, California, USA               | Past Investigator                                       | ADNI                                                                                       |
| Yaakov                            | Stern      |                       | PhD              | Columbia University Medical Center  | New York, New York, USA                  | Investigator                                            | ADNI                                                                                       |
| Lawrence S.                       | Honig      |                       | MD, PhD          | Columbia University Medical Center  | New York, New York, USA                  | Investigator                                            | ADNI                                                                                       |
| Akiva                             | Mintz      |                       | MD, PhD          | Columbia University Medical Center  | New York, New York, USA                  | Investigator                                            | ADNI                                                                                       |
| Raj C.                            | Shah       |                       | MD               | Rush University Medical Center      | Chicago, Illinois, USA                   | Investigator                                            | ADNI                                                                                       |
| Ajay                              | Sood       |                       | MD, PhD          | Rush University Medical Center      | Chicago, Illinois, USA                   | Investigator                                            | ADNI                                                                                       |
| Kimberly S.                       | Blanchard  |                       | DNP, APRN, NP-C  | Rush University Medical Center      | Chicago, Illinois, USA                   | Investigator                                            | ADNI                                                                                       |
| Debra                             | Fleischman |                       | PhD              | Rush University Medical Center      | Chicago, Illinois, USA                   | Past Investigator                                       | ADNI                                                                                       |
| Konstantinos                      | Arfanakis  |                       | PhD              | Rush University Medical Center      | Chicago, Illinois, USA                   | Past Investigator                                       | ADNI                                                                                       |
| Ranjan                            | Duara      |                       | MD               | Wien Center                         | Miami Beach, Florida, USA                | Investigator                                            | ADNI                                                                                       |
| Daniel                            | Varon      |                       | MD               | Wien Center                         | Miami Beach, Florida, USA                | Investigator                                            | ADNI                                                                                       |
| Maria T.                          | Greig      |                       |                  | Wien Center                         | Miami Beach, Florida, USA                | Investigator                                            | ADNI                                                                                       |
| P. Murali                         | Doraiswamy |                       | MBBS, FRCP       | Duke University Medical Center      | Durham, North Carolina, USA              | Investigator                                            | ADNI                                                                                       |

## Supplemental Online Content: Nonauthor Collaborators

\*First name, last name, and suffix (if applicable) are required and will appear in PubMed.

| *First Name and Middle Initial(s) | *Last Name   | *Suffix (eg, Jr, III) | Academic Degrees | Institution                                       | Location (city, state/province, country) | Role or Contribution, eg, chair, principal investigator | Group (if more than 1 Group listed in the byline) and/or Subgroup (eg, Steering Committee) |
|-----------------------------------|--------------|-----------------------|------------------|---------------------------------------------------|------------------------------------------|---------------------------------------------------------|--------------------------------------------------------------------------------------------|
| Jeffrey R.                        | Petrella     |                       | MD               | Duke University Medical Center                    | Durham, North Carolina, USA              | Investigator                                            | ADNI                                                                                       |
| Olga                              | James        |                       | MD               | Duke University Medical Center                    | Durham, North Carolina, USA              | Past Investigator                                       | ADNI                                                                                       |
| Salvador                          | Borges-Neto  |                       | MD               | Duke University Medical Center                    | Durham, North Carolina, USA              | Investigator                                            | ADNI                                                                                       |
| Terence Z.                        | Wong         |                       | MD               | Duke University Medical Center                    | Durham, North Carolina, USA              | Investigator                                            | ADNI                                                                                       |
| Anton P.                          | Porsteinsson |                       | MD               | University of Rochester Medical Center            | Rochester, New York, USA                 | Investigator                                            | ADNI                                                                                       |
| Bonnie                            | Goldstein    |                       | MS, NP           | University of Rochester Medical Center            | Rochester, New York, USA                 | Investigator                                            | ADNI                                                                                       |
| Kimberly S.                       | Martin       |                       | RN               | University of Rochester Medical Center            | Rochester, New York, USA                 | Investigator                                            | ADNI                                                                                       |
| Gaby                              | Thai         |                       | MD               | University of California Irvine                   | Irvine, California, USA                  | Investigator                                            | ADNI                                                                                       |
| Aimee                             | Pierce       |                       | MD               | University of California Irvine                   | Irvine, California, USA                  | Investigator                                            | ADNI                                                                                       |
| Christopher                       | Reist        |                       | MD               | University of California Irvine                   | Irvine, California, USA                  | Investigator                                            | ADNI                                                                                       |
| Beatriz                           | Yanez        |                       | RN               | University of California Irvine                   | Irvine, California, USA                  | Investigator                                            | ADNI                                                                                       |
| Elizabeth                         | Sosa         |                       | PhD              | University of California Irvine                   | Irvine, California, USA                  | Investigator                                            | ADNI                                                                                       |
| Megan                             | Witbracht    |                       | PhD              | University of California Irvine                   | Irvine, California, USA                  | Investigator                                            | ADNI                                                                                       |
| Carl                              | Sadowsky     |                       | MD               | Premier Research Institute (Palm Beach Neurology) | West Palm Beach, Florida, USA            | Investigator                                            | ADNI                                                                                       |
| Walter                            | Martinez     |                       | MD               | Premier Research Institute (Palm Beach Neurology) | West Palm Beach, Florida, USA            | Investigator                                            | ADNI                                                                                       |
| Teresa                            | Villena      |                       | MD               | Premier Research Institute (Palm Beach Neurology) | West Palm Beach, Florida, USA            | Investigator                                            | ADNI                                                                                       |

## Supplemental Online Content: Nonauthor Collaborators

\*First name, last name, and suffix (if applicable) are required and will appear in PubMed.

| *First Name and Middle Initial(s) | *Last Name | *Suffix (eg, Jr, III) | Academic Degrees | Institution                             | Location (city, state/province, country) | Role or Contribution, eg, chair, principal investigator | Group (if more than 1 Group listed in the byline) and/or Subgroup (eg, Steering Committee) |
|-----------------------------------|------------|-----------------------|------------------|-----------------------------------------|------------------------------------------|---------------------------------------------------------|--------------------------------------------------------------------------------------------|
| Howard                            | Rosen      |                       | MD               | University of California, San Francisco | San Francisco, California, USA           | Investigator                                            | ADNI                                                                                       |
| David                             | Perry      |                       |                  | University of California, San Francisco | San Francisco, California, USA           | Investigator                                            | ADNI                                                                                       |
| Raymond Scott                     | Turner     |                       | MD, PhD          | Gerogetown University Medical Center    | Washington DC, USA                       | Investigator                                            | ADNI                                                                                       |
| Kathleen                          | Johnson    |                       | NP               | Gerogetown University Medical Center    | Washington DC, USA                       | Investigator                                            | ADNI                                                                                       |
| Brigid                            | Reynolds   |                       | NP               | Gerogetown University Medical Center    | Washington DC, USA                       | Investigator                                            | ADNI                                                                                       |
| Kelly                             | MCCann     |                       | BA               | Gerogetown University Medical Center    | Washington DC, USA                       | Investigator                                            | ADNI                                                                                       |
| Jessica                           | Poe        |                       | BS               | Gerogetown University Medical Center    | Washington DC, USA                       | Investigator                                            | ADNI                                                                                       |
| Reisa A.                          | Sperling   |                       | MD               | Brigham and Women's Hospital            | Boston, Massachusetts, USA               | Investigator                                            | ADNI                                                                                       |
| Keith A.                          | Johnson    |                       | MD               | Brigham and Women's Hospital            | Boston, Massachusetts, USA               | Investigator                                            | ADNI                                                                                       |
| Gad                               | Marshall   |                       | MD               | Brigham and Women's Hospital            | Boston, Massachusetts, USA               | Investigator                                            | ADNI                                                                                       |
| Christine M.                      | Belden     |                       | PsyD             | Banner Sun Health Research Institute    | Sun City, Arizona, USA                   | Investigator                                            | ADNI                                                                                       |
| Alireza                           | Atri       |                       | MD, PhD          | Banner Sun Health Research Institute    | Sun City, Arizona, USA                   | Investigator                                            | ADNI                                                                                       |
| Bryan M.                          | Spann      |                       | DO, PhD          | Banner Sun Health Research Institute    | Sun City, Arizona, USA                   | Investigator                                            | ADNI                                                                                       |
| Kelly A.                          | Clark      |                       |                  | Banner Sun Health Research Institute    | Sun City, Arizona, USA                   | Investigator                                            | ADNI                                                                                       |
| Edward                            | Zamrini    |                       | MD               | Banner Sun Health Research Institute    | Sun City, Arizona, USA                   | Past Investigator                                       | ADNI                                                                                       |
| Marwan                            | Sabbagh    |                       | MD               | Banner Sun Health Research Institute    | Sun City, Arizona, USA                   | Past Investigator                                       | ADNI                                                                                       |
| Thomas O.                         | Obisesan   |                       | MD, MPH          | Howard University                       | Washington DC, USA                       | Investigator                                            | ADNI                                                                                       |

## Supplemental Online Content: Nonauthor Collaborators

\*First name, last name, and suffix (if applicable) are required and will appear in PubMed.

| *First Name and Middle Initial(s) | *Last Name  | *Suffix (eg, Jr, III) | Academic Degrees | Institution              | Location (city, state/province, country) | Role or Contribution, eg, chair, principal investigator | Group (if more than 1 Group listed in the byline) and/or Subgroup (eg, Steering Committee) |
|-----------------------------------|-------------|-----------------------|------------------|--------------------------|------------------------------------------|---------------------------------------------------------|--------------------------------------------------------------------------------------------|
| Oyonumo E.                        | Ntekim      |                       | MD, PhD          | Howard University        | Washington DC, USA                       | Investigator                                            | ADNI                                                                                       |
| Saba                              | Wolday      |                       | MSc              | Howard University        | Washington DC, USA                       | Investigator                                            | ADNI                                                                                       |
| Evaristus                         | Nwulia      |                       | MD               | Howard University        | Washington DC, USA                       | Investigator                                            | ADNI                                                                                       |
| Sheeba                            | Nadarajah   |                       | PhD, RN          | Howard University        | Washington DC, USA                       | Investigator                                            | ADNI                                                                                       |
| Sterling                          | Johnson     |                       | PhD              | University of Wisconsin  | Madison, Wisconsin, USA                  | Investigator                                            | ADNI                                                                                       |
| Sanjay                            | Asthana     |                       | MD               | University of Wisconsin  | Madison, Wisconsin, USA                  | Investigator                                            | ADNI                                                                                       |
| Cynthia M.                        | Carlsson    |                       | MD, MS           | University of Wisconsin  | Madison, Wisconsin, USA                  | Investigator                                            | ADNI                                                                                       |
| Elaine R.                         | Peskind     |                       | MD               | University of Washington | Seattle, Washington, USA                 | Investigator                                            | ADNI                                                                                       |
| Eric C.                           | Petrie      |                       | MD, MS           | University of Washington | Seattle, Washington, USA                 | Investigator                                            | ADNI                                                                                       |
| Gail                              | Li          |                       | MD, PhD          | University of Washington | Seattle, Washington, USA                 | Investigator                                            | ADNI                                                                                       |
| Jerome                            | Yesavage    |                       | MD               | Stanford University      | Stanford, California, USA                | Investigator                                            | ADNI                                                                                       |
| Joy L.                            | Taylor      |                       | PhD              | Stanford University      | Stanford, California, USA                | Investigator                                            | ADNI                                                                                       |
| Steven                            | Chao        |                       | MD, PhD          | Stanford University      | Stanford, California, USA                | Investigator                                            | ADNI                                                                                       |
| Jaila                             | Coleman     |                       | BA               | Stanford University      | Stanford, California, USA                | Investigator                                            | ADNI                                                                                       |
| Jessica D.                        | White       |                       | BA               | Stanford University      | Stanford, California, USA                | Past Investigator                                       | ADNI                                                                                       |
| Barton                            | Lane        |                       | MD               | Stanford University      | Stanford, California, USA                | Past Investigator                                       | ADNI                                                                                       |
| Allyson                           | Rosen       |                       | PhD              | Stanford University      | Stanford, California, USA                | Past Investigator                                       | ADNI                                                                                       |
| Jared                             | Tinklenberg |                       | MD               | Stanford University      | Stanford, California, USA                | Past Investigator                                       | ADNI                                                                                       |

## Supplemental Online Content: Nonauthor Collaborators

\*First name, last name, and suffix (if applicable) are required and will appear in PubMed.

| *First Name and Middle Initial(s) | *Last Name    | *Suffix (eg, Jr, III) | Academic Degrees | Institution                                                                                                                                                        | Location (city, state/province, country) | Role or Contribution, eg, chair, principal investigator | Group (if more than 1 Group listed in the byline) and/or Subgroup (eg, Steering Committee) |
|-----------------------------------|---------------|-----------------------|------------------|--------------------------------------------------------------------------------------------------------------------------------------------------------------------|------------------------------------------|---------------------------------------------------------|--------------------------------------------------------------------------------------------|
| Michael                           | Lin           |                       | MD               | Cornell University                                                                                                                                                 | Ithaca, New York, USA                    | Investigator                                            | ADNI                                                                                       |
| Gloria                            | Chiang        |                       | MD               | Cornell University                                                                                                                                                 | Ithaca, New York, USA                    | Investigator                                            | ADNI                                                                                       |
| Lisa                              | Ravdin        |                       | PhD              | Cornell University                                                                                                                                                 | Ithaca, New York, USA                    | Investigator                                            | ADNI                                                                                       |
| Norman                            | Relkin        |                       | MD, PhD          | Cornell University                                                                                                                                                 | Ithaca, New York, USA                    | Past Investigator                                       | ADNI                                                                                       |
| Abigail                           | O'Connell     |                       | MS, APRN, FNP-C  | Roper St. Francis Healthcare                                                                                                                                       | Charleston, South Carolina, USA          | Investigator                                            | ADNI                                                                                       |
| Jacobo                            | Mintzer       |                       | MD, MBA          | Roper St. Francis Healthcare                                                                                                                                       | Charleston, South Carolina, USA          | Investigator                                            | ADNI                                                                                       |
| Arthur                            | Williams      |                       | BS               | Roper St. Francis Healthcare                                                                                                                                       | Charleston, South Carolina, USA          | Investigator                                            | ADNI                                                                                       |
| James M.                          | Noble         |                       |                  | Taub Institute for Research on Alzheimer's Disease and the Aging Brain, G.H. Sergievsky Center, Department of Neurology, Columbia University Irving Medical Center | New York City, NY, USA                   | PI                                                      | DIAN                                                                                       |
| Neill R.                          | Graff-Radford |                       |                  | Mayo Clinic, Department of Neurology                                                                                                                               | Jacksonville, Florida                    | Investigator                                            | DIAN                                                                                       |
| Jonathan                          | Voglein       |                       |                  | 1) Department of Neurology, Ludwig-Maximilians-Universität München, Munich, Germany<br>2) German Center for Diseases (DZNE)                                        | Munich, Germany                          | PI                                                      | DIAN                                                                                       |
| Patricio                          | Chrem Mendez  |                       |                  | Department of Cognitive Neurology, Institute for Neurological Research Fleni                                                                                       | Buenos Aires, Argentina                  | Investigator                                            | DIAN                                                                                       |

## Supplemental Online Content: Nonauthor Collaborators

\*First name, last name, and suffix (if applicable) are required and will appear in PubMed.

| *First Name and Middle Initial(s) | *Last Name | *Suffix (eg, Jr, III) | Academic Degrees | Institution                                                                                   | Location (city, state/province, country) | Role or Contribution, eg, chair, principal investigator | Group (if more than 1 Group listed in the byline) and/or Subgroup (eg, Steering Committee) |
|-----------------------------------|------------|-----------------------|------------------|-----------------------------------------------------------------------------------------------|------------------------------------------|---------------------------------------------------------|--------------------------------------------------------------------------------------------|
| Ezequiel                          | Surace     |                       |                  | Department of Molecular Biology and Neuropathology, Institute for Neurological Research Fleni | Buenos Aires, Argentina                  | Investigator                                            | DIAN                                                                                       |
| Snezana                           | Ikonomovic |                       |                  | University of Pittsburgh, Department of Neurology                                             | Pittsburgh, Pennsylvania                 | Investigator                                            | DIAN                                                                                       |
| Neelesh K.                        | Nadkarni   |                       |                  | University of Pittsburgh, Departments of Medicine (Geriatric Medicine) and Neurology          | Pittsburgh, Pennsylvania                 | Investigator                                            | DIAN                                                                                       |
| Francisco                         | Lopera     |                       |                  | Grupo de Neurociencias de Antioquia (GNA), Universidad de Antioquia, Medellin, Colombia       | Medellin, Colombia                       | PI                                                      | DIAN                                                                                       |
| Laura                             | Ramirez    |                       |                  | Grupo de Neurociencias de Antioquia (GNA), Universidad de Antioquia, Medellin, Colombia       | Medellin Colombia                        | Investigator                                            | DIAN                                                                                       |
| David                             | Aguillon   |                       |                  | Grupo de Neurociencias de Antioquia (GNA), Universidad de Antioquia, Medellin, Colombia       | Medellin Colombia                        | Investigator                                            | DIAN                                                                                       |
| Yudy                              | Leon       |                       |                  | Grupo de Neurociencias de Antioquia (GNA), Universidad de Antioquia, Medellin, Colombia       | Medellin Colombia                        | Investigator                                            | DIAN                                                                                       |
| Claudia                           | Ramos      |                       |                  | Grupo de Neurociencias de Antioquia (GNA), Universidad de Antioquia, Medellin, Colombia       | Medellin Colombia                        | Investigator                                            | DIAN                                                                                       |
| Diana                             | Alzate     |                       |                  | Grupo de Neurociencias de Antioquia (GNA), Universidad de Antioquia, Medellin, Colombia       | Medellin Colombia                        | Investigator                                            | DIAN                                                                                       |
| Ana                               | Baena      |                       |                  | Grupo de Neurociencias de Antioquia (GNA), Universidad de Antioquia, Medellin, Colombia       | Medellin Colombia                        | Investigator                                            | DIAN                                                                                       |
| Natalia                           | Londono    |                       |                  | Grupo de Neurociencias de Antioquia (GNA), Universidad de Antioquia, Medellin, Colombia       | Medellin Colombia                        | Investigator                                            | DIAN                                                                                       |

## Supplemental Online Content: Nonauthor Collaborators

\*First name, last name, and suffix (if applicable) are required and will appear in PubMed.

| *First Name and Middle Initial(s) | *Last Name    | *Suffix (eg, Jr, III) | Academic Degrees | Institution                                                                                                                                                             | Location (city, state/province, country) | Role or Contribution, eg, chair, principal investigator | Group (if more than 1 Group listed in the byline) and/or Subgroup (eg, Steering Committee) |
|-----------------------------------|---------------|-----------------------|------------------|-------------------------------------------------------------------------------------------------------------------------------------------------------------------------|------------------------------------------|---------------------------------------------------------|--------------------------------------------------------------------------------------------|
| Sonia                             | Moreno        |                       |                  | Grupo de Neurociencias de Antioquia (GNA), Universidad de Antioquia, Medellin, Colombia                                                                                 | Medellin Colombia                        | Investigator                                            | DIAN                                                                                       |
| Christoph                         | Laske         |                       |                  | German Center for Neurodegenerative Diseases Section for Dementia Research, Hertie-Institute for Clinical Brain Research and Department of Psychiatry and Psychotherapy | Tubingen, Germany                        | Site Clinical PI                                        | DIAN                                                                                       |
| Elke                              | Kuder-Buletta |                       |                  | German Center for Neurodegenerative Diseases                                                                                                                            | Tubingen, Germany                        | Site Coordinator                                        | DIAN                                                                                       |
| Susanne                           | Graber-Sultan |                       |                  | German Center for Neurodegenerative Diseases                                                                                                                            | Tubingen, Germany                        | Site Neuro- psychologist                                | DIAN                                                                                       |
| Oliver                            | Preisiche     |                       |                  | German Center for Neurodegenerative Diseases Section for Dementia Research, Hertie-Institute for Clinical Brain Research and Department of Psychiatry and Psychotherapy | Tubingen, Germany                        | Site Physician 1                                        | DIAN                                                                                       |
| Anna                              | Hofmann       |                       |                  | German Center for Neurodegenerative Diseases Hertie-Institute for Clinical Brain Research                                                                               | Tubingen, Germany                        | Site Physician 2                                        | DIAN                                                                                       |
| Takeshi                           | Ikeuchi       |                       |                  | Brain Research Institute                                                                                                                                                | Niigata, Japan                           | PI                                                      | DIAN                                                                                       |
| Kensaku                           | Kasuga        |                       |                  | Niigata University                                                                                                                                                      | Niigata, Japan                           | Site PI                                                 | DIAN                                                                                       |
| Yoshiki                           | Niimi         |                       |                  | The University of Tokyo Hospital Unit for Early and Exploratory Clinical Development                                                                                    | Tokyo, Japan                             | Site PI                                                 | DIAN                                                                                       |
| Kenji                             | Ishii         |                       |                  | Tokyo Metropolitan Institute of Gerontology                                                                                                                             | Tokyo, Japan                             | Representative of PET center                            | DIAN                                                                                       |
| Michio                            | Senda         |                       |                  | Kobe City Medical Center General Hospital                                                                                                                               | Kobe, Japan                              | Representative of PET center                            | DIAN                                                                                       |



## Supplemental Online Content: Nonauthor Collaborators

\*First name, last name, and suffix (if applicable) are required and will appear in PubMed.

| *First Name and Middle Initial(s) | *Last Name       | *Suffix (eg, Jr, III) | Academic Degrees | Institution                                                                                                                  | Location (city, state/province, country) | Role or Contribution, eg, chair, principal investigator | Group (if more than 1 Group listed in the byline) and/or Subgroup (eg, Steering Committee) |
|-----------------------------------|------------------|-----------------------|------------------|------------------------------------------------------------------------------------------------------------------------------|------------------------------------------|---------------------------------------------------------|--------------------------------------------------------------------------------------------|
| Dave                              | Cash             |                       |                  | Dementia Research Centre, UCL<br>Queen Square Institute of Neurology, London, UK<br>UK<br>Dementia Research Institute at UCL | London, United Kingdom                   | Investigator                                            | DIAN                                                                                       |
| Jee Hoon                          | Roh              |                       |                  | Korea University College of Medicine, Seoul, South Korea                                                                     | Seoul Korea                              | Secondary                                               | DIAN                                                                                       |
| Meghan C.                         | Riddle           |                       |                  | Butler Hospital, Warren Alpert School of Medicine at Brown University                                                        | Providence, Rhode Island                 | PI                                                      | DIAN                                                                                       |
| William                           | Menard           |                       |                  | Butler Hospital, Warren Alpert School of Medicine at Brown University                                                        | Providence, Rhode Island                 | Investigator                                            | DIAN                                                                                       |
| Courtney                          | Bodge            |                       |                  | Butler Hospital, Warren Alpert School of Medicine at Brown University                                                        | Providence, Rhode Island                 | Investigator                                            | DIAN                                                                                       |
| Mustafa                           | Surti            |                       |                  | Butler Hospital, Warren Alpert School of Medicine at Brown University                                                        | Providence, Rhode Island                 | Investigator                                            | DIAN                                                                                       |
| Leonel Tadao                      | Takada           |                       |                  | Hospital das Clinicas, University of Sao Paulo School of Medicine                                                            | Sao Paulo, Brazil                        | PI                                                      | DIAN                                                                                       |
| Martin                            | Farlow           |                       |                  | Indiana University                                                                                                           | Bloomington, Indiana, USA                | PI                                                      | DIAN                                                                                       |
| VJ                                | Sanchez-Gonzalez |                       |                  | Doctorado en Biociencias & Departamento de Clinicas, Centro Universitario de Los Altos, UDG                                  | Guadalajara, Mexico                      | PI                                                      | DIAN                                                                                       |
| Maribel                           | Orozco-Barajas   |                       |                  | Doctorado en Biociencias & Departamento de Salud, Centro Universitario de Los Altos, UDG                                     | Guadalajara, Mexico                      | Investigator                                            | DIAN                                                                                       |

## Supplemental Online Content: Nonauthor Collaborators

\*First name, last name, and suffix (if applicable) are required and will appear in PubMed.

| *First Name and Middle Initial(s) | *Last Name    | *Suffix (eg, Jr, III) | Academic Degrees | Institution                                                                                                                                                                     | Location (city, state/province, country) | Role or Contribution, eg, chair, principal investigator | Group (if more than 1 Group listed in the byline) and/or Subgroup (eg, Steering Committee) |
|-----------------------------------|---------------|-----------------------|------------------|---------------------------------------------------------------------------------------------------------------------------------------------------------------------------------|------------------------------------------|---------------------------------------------------------|--------------------------------------------------------------------------------------------|
| Alan E.                           | Renton        |                       |                  | Department of Genetics and Genomic Sciences, Nash Family Department of Neuroscience, and Ronald M. Loeb Center for Alzheimer's Disease, Icahn School of Medicine at Mount Sinai | New York, NY, USA                        | Genetics Core Staff                                     | DIAN                                                                                       |
| Bianca T.                         | Esposito      |                       |                  | Department of Genetics and Genomic Sciences and Ronald M. Loeb Center for Alzheimer's Disease, Icahn School of Medicine at Mount Sinai                                          | New York, NY, USA                        | Investigator                                            | DIAN                                                                                       |
| Celeste M.                        | Karch         |                       |                  | Department of Psychiatry, Washington University in St. Louis                                                                                                                    | St. Louis, MO, USA                       | Project Leader                                          | DIAN                                                                                       |
| Jacob                             | Marsh         |                       |                  | Department of Psychiatry, Washington University in St. Louis                                                                                                                    | St. Louis, MO, USA                       | Investigator                                            | DIAN                                                                                       |
| Victoria                          | Fernanadez    |                       |                  | 1)Department of Psychiatry, Washington University in St. Louis, Mo, USA 2)NeuroGenomics and Informatics Center, Washington University School of Medicine, St. Louis, MO, USA    | St. Louis, MO, USA                       | Investigator                                            | DIAN                                                                                       |
| Gina                              | Jerome        |                       |                  | Department of Neurology, Washington University in St. Louis                                                                                                                     | St. Louis, MO, USA                       | DIAN Biomarker Core Staff Scientist                     | DIAN                                                                                       |
| Elizabeth                         | Herries       |                       |                  | Department of Neurology, Washington University in St. Louis                                                                                                                     | St. Louis, MO, USA                       | DIAN Biomarker Core Staff Scientist                     | DIAN                                                                                       |
| Jorge                             | Llibre-Guerra |                       |                  | Washington University School of Medicine in St. Louis                                                                                                                           | St. Louis, MO, USA                       | Investigator                                            | DIAN                                                                                       |
| Erik C.B.                         | Johnson       |                       |                  | Goizueta Alzheimer's Disease Research Center, Emory University, Atlanta, GA 30329                                                                                               | Atlanta, GA                              | Project Leader 3-Investigator                           | DIAN                                                                                       |
| Nicholas T.                       | Seyfried      |                       |                  | Goizueta Alzheimer's Disease Research Center, Emory University                                                                                                                  | Atlanta, GA                              | Project 3 co-PI                                         | DIAN                                                                                       |

## Supplemental Online Content: Nonauthor Collaborators

\*First name, last name, and suffix (if applicable) are required and will appear in PubMed.

| *First Name and Middle Initial(s) | *Last Name   | *Suffix (eg, Jr, III) | Academic Degrees | Institution                                                                                                                                              | Location (city, state/province, country) | Role or Contribution, eg, chair, principal investigator | Group (if more than 1 Group listed in the byline) and/or Subgroup (eg, Steering Committee) |
|-----------------------------------|--------------|-----------------------|------------------|----------------------------------------------------------------------------------------------------------------------------------------------------------|------------------------------------------|---------------------------------------------------------|--------------------------------------------------------------------------------------------|
| William S.                        | Brooks       |                       |                  | 1) Neuroscience Research Australia, Sydney NSW 2031 Australia<br>2) School of Medical Sciences, University of New South Wales, Sydney NSW 2052 Australia | Sydney, Australia                        | Investigator                                            | DIAN                                                                                       |
| Jacob A                           | Bechara      |                       |                  | Neuroscience Research Australia, Sydney NSW 2031 Australia                                                                                               | Sydney, Australia                        | Investigator                                            | DIAN                                                                                       |
| Erin E.                           | Franklin     |                       |                  | Department of Pathology and Immunology, Washington University in St. Louis                                                                               | St. Louis, MO, USA                       | Core Coordinator                                        | DIAN                                                                                       |
| Allison                           | Chen         |                       |                  | Washington University School of Medicine in St. Louis                                                                                                    | St. Louis, MO, USA                       | Staff Scientist                                         | DIAN                                                                                       |
| Charles                           | Chen         |                       |                  | Washington University School of Medicine in St. Louis                                                                                                    | St. Louis, MO, USA                       | Graduate Research Asst.                                 | DIAN                                                                                       |
| Shaney                            | Flores       |                       |                  | Washington University School of Medicine in St. Louis                                                                                                    | St. Louis, MO, USA                       | Senior Research Tech                                    | DIAN                                                                                       |
| Nancy                             | Hantler      |                       |                  | Washington University School of Medicine in St. Louis                                                                                                    | St. Louis, MO, USA                       | Clinical Research Specialist                            | DIAN                                                                                       |
| Russ                              | Hornbeck     |                       |                  | Washington University School of Medicine in St. Louis                                                                                                    | St. Louis, MO, USA                       | IT Project Manager III                                  | DIAN                                                                                       |
| Steve                             | Jarman       |                       |                  | Washington University School of Medicine in St. Louis                                                                                                    | St. Louis, MO, USA                       | Research Lab Manager                                    | DIAN                                                                                       |
| Sarah                             | Keefe        |                       |                  | Washington University School of Medicine in St. Louis                                                                                                    | St. Louis, MO, USA                       | Bus & Tech App Tech I                                   | DIAN                                                                                       |
| Deborah                           | Koudelis     |                       |                  | Washington University School of Medicine in St. Louis                                                                                                    | St. Louis, MO, USA                       | Manager Regulatory & Compliance                         | DIAN                                                                                       |
| Parinaz                           | Massoumzadeh |                       |                  | Washington University School of Medicine in St. Louis                                                                                                    | St. Louis, MO, USA                       | Senior Scientist                                        | DIAN                                                                                       |
| Austin                            | McCullough   |                       |                  | Washington University School of Medicine in St. Louis                                                                                                    | St. Louis, MO, USA                       | KARI Postdoc Research Associate                         | DIAN                                                                                       |
| Nicole                            | McKay        |                       |                  | Washington University School of Medicine in St. Louis                                                                                                    | St. Louis, MO, USA                       | Postdoc Research Associate                              | DIAN                                                                                       |

## Supplemental Online Content: Nonauthor Collaborators

\*First name, last name, and suffix (if applicable) are required and will appear in PubMed.

| *First Name and Middle Initial(s) | *Last Name   | *Suffix (eg, Jr, III) | Academic Degrees | Institution                                           | Location (city, state/province, country) | Role or Contribution, eg, chair, principal investigator | Group (if more than 1 Group listed in the byline) and/or Subgroup (eg, Steering Committee) |
|-----------------------------------|--------------|-----------------------|------------------|-------------------------------------------------------|------------------------------------------|---------------------------------------------------------|--------------------------------------------------------------------------------------------|
| Joyce                             | Nicklaus     |                       |                  | Washington University School of Medicine in St. Louis | St. Louis, MO, USA                       | Manager Clinical Trials                                 | DIAN                                                                                       |
| Christine                         | Pulizos      |                       |                  | Washington University School of Medicine in St. Louis | St. Louis, MO, USA                       | Project Manager                                         | DIAN                                                                                       |
| Qing                              | Wang         |                       |                  | Washington University School of Medicine in St. Louis | St. Louis, MO, USA                       | Instructor in Radiology                                 | DIAN                                                                                       |
| Sheetal                           | Mishall      |                       |                  | Washington University School of Medicine in St. Louis | St. Louis, MO, USA                       | Clinical Research Coordinator I                         | DIAN                                                                                       |
| Edita                             | Sabaredzovic |                       |                  | Washington University School of Medicine in St. Louis | St. Louis, MO, USA                       | Clinical Research Corrdinator I                         | DIAN                                                                                       |
| Emily                             | Deng         |                       |                  | Washington University School of Medicine in St. Louis | St. Louis, MO, USA                       | Research Tech II                                        | DIAN                                                                                       |
| Madison                           | Candela      |                       |                  | Washington University School of Medicine in St. Louis | St. Louis, MO, USA                       | Clinical Research Study Asst II                         | DIAN                                                                                       |
| Hunter                            | Smith        |                       |                  | Washington University School of Medicine in St. Louis | St. Louis, MO, USA                       | Research Tech II                                        | DIAN                                                                                       |
| Diana                             | Hobbs        |                       |                  | Washington University School of Medicine in St. Louis | St. Louis, MO, USA                       | Postdoc Research Associate                              | DIAN                                                                                       |
| Jalen                             | Scott        |                       |                  | Washington University School of Medicine in St. Louis | St. Louis, MO, USA                       | Research Tech II                                        | DIAN                                                                                       |
| Chengjie                          | Xiong        |                       |                  | Washington University School of Medicine in St. Louis | St. Louis, MO, USA                       | Core Leader                                             | DIAN                                                                                       |
| Peter                             | Wang         |                       |                  | Washington University School of Medicine in St. Louis | St. Louis, MO, USA                       | Investigator                                            | DIAN                                                                                       |
| Xiong                             | Xu           |                       |                  | Washington University School of Medicine in St. Louis | St. Louis, MO, USA                       | Investigator                                            | DIAN                                                                                       |
| Yan                               | Li           |                       |                  | Washington University School of Medicine in St. Louis | St. Louis, MO, USA                       | Investigator                                            | DIAN                                                                                       |
| Emily                             | Gremminger   |                       |                  | Washington University School of Medicine in St. Louis | St. Louis, MO, USA                       | Investigator                                            | DIAN                                                                                       |
| Yinjiao                           | Ma           |                       |                  | Washington University School of Medicine in St. Louis | St. Louis, MO, USA                       | Investigator                                            | DIAN                                                                                       |

## Supplemental Online Content: Nonauthor Collaborators

\*First name, last name, and suffix (if applicable) are required and will appear in PubMed.

| *First Name and Middle Initial(s) | *Last Name             | *Suffix (eg, Jr, III) | Academic Degrees | Institution                                                                                | Location (city, state/province, country) | Role or Contribution, eg, chair, principal investigator | Group (if more than 1 Group listed in the byline) and/or Subgroup (eg, Steering Committee) |
|-----------------------------------|------------------------|-----------------------|------------------|--------------------------------------------------------------------------------------------|------------------------------------------|---------------------------------------------------------|--------------------------------------------------------------------------------------------|
| Ryan                              | Bui                    |                       |                  | Washington University School of Medicine in St. Louis                                      | St. Louis, MO, USA                       | Investigator                                            | DIAN                                                                                       |
| Ruijin                            | Lu                     |                       |                  | Washington University School of Medicine in St. Louis                                      | St. Louis, MO, USA                       | Investigator                                            | DIAN                                                                                       |
| Ralph                             | Martins                |                       |                  | Edith Cowan University                                                                     | Perth, Australia                         | PI                                                      | DIAN                                                                                       |
| Ana Luisa                         | Sosa Ortiz             |                       |                  |                                                                                            | Mexico City, Mexico                      | PI                                                      | DIAN                                                                                       |
| Alisha                            | Daniels                |                       |                  | Washington University School of Medicine in St. Louis                                      | St. Louis, MO, USA                       | Investigator                                            | DIAN                                                                                       |
| Laura                             | Courtney               |                       |                  | Washington University School of Medicine in St. Louis                                      | St. Louis, MO, USA                       | Investigator                                            | DIAN                                                                                       |
| Hiroshi                           | Mori                   |                       |                  | Osaka Metropolitan University                                                              |                                          | Investigator                                            | DIAN                                                                                       |
| Charlene                          | Supnet-Bell, PhD (CSB) |                       |                  | Department of Neurology, Washington University in St. Louis                                | St. Louis, MO, USA                       | Investigator                                            | DIAN                                                                                       |
| Jinbin                            | Xu                     |                       |                  | Department of Radiology, Washington University in St. Louis                                | St. Louis, MO, USA                       | Investigator                                            | DIAN                                                                                       |
| John                              | Ringman                |                       |                  | Department of Neurology, Keck School of Medicine of USC, University of Southern California | Los Angeles, CA, USA                     | Investigator                                            | DIAN                                                                                       |
| Nicolas                           | Barthelemy             |                       |                  | Department of Neurology, Washington University in St. Louis                                | St. Louis, MO, USA                       | Investigator                                            | DIAN                                                                                       |
| Jennifer                          | Smith                  |                       |                  | Department of Neurology, Washington University in St. Louis                                | St. Louis, MO, USA                       | Investigator                                            | DIAN                                                                                       |
