# Supplementary material
Source: PubMed Central journal article supplement (PMC10580156)
Supplement: jamaneurol-e233618-s003.pdf [file jamaneurol-e233618-s003.pdf]

## Data Sharing Statement

Shirzadi. Etiology of White Matter Hyperintensities in Autosomal Dominant and Sporadic Alzheimer Disease. *JAMA Neurol.* Published October 16, 2023.

doi:10.1001/jamaneurol.2023.3618

### Data

**Data available:** Yes

**Data types:** Deidentified participant data, Data dictionary

**How to access data:** the data from three cohorts are publicly available (DIAN, ADNI, and HABS)

**When available:** With publication

### Supporting Documents

**Document types:** None

### Additional Information

**Who can access the data:** researchers whose proposed use of the data has been approved

**Types of analyses:** for research purposes

**Mechanisms of data availability:** after approval of a proposal,
